# Supplementary material for: The Singularity of Cetacea Behavior Parallels the Complete Inactivation of Melatonin Gene Modules
Source: PubMed Central journal article supplement (PMC6410235; doi:10.3390/genes10020121), 2019-02-06
Supplement: genes-10-00121-s001.pdf [file genes-10-00121-s001.pdf]

## **Supplementary information**

**Full Title: The singularity of Cetacea behavior parallels the complete inactivation of melatonin gene modules**

**Short Title: Melatonin gene modules are eroded in Cetacea**

Mónica Lopes-Marques<sup>1•</sup>, Raquel Ruivo<sup>1•\*</sup>, Luís Q. Alves<sup>1,2</sup>, Nelson Sousa<sup>1</sup>, André M. Machado<sup>1</sup>, L.

Filipe C. Castro<sup>1,2\*</sup>

<sup>1</sup>CIIMAR/CIMAR - Interdisciplinary Centre of Marine and Environmental Research, University of Porto, Portugal

<sup>2</sup>FCUP - Faculty of Sciences, Department of Biology, University of Porto, Portugal

•Equal Contribution

\*Correspondence: [ruiivo@ciimar.up.pt](mailto:ruiivo@ciimar.up.pt); [filipe.castro@ciimar.up.pt](mailto:filipe.castro@ciimar.up.pt)

|                                                                                                                                                                                           |    |
|-------------------------------------------------------------------------------------------------------------------------------------------------------------------------------------------|----|
| <b>Figure S1:</b> Comparative synteny maps of <i>Aanat</i> genomic locus.                                                                                                                 | 3  |
| <b>Figure S2:</b> Multiple alignment of the predicted exon 1 of <i>Aanat</i> in Cetacea.                                                                                                  | 4  |
| <b>Figure S3:</b> SRA validation for conserved stop mutation in exon 1 of <i>Aanat</i> in Cetacea.                                                                                        | 5  |
| <b>Figure S4:</b> Comparative synteny maps of <i>Asmt</i> genomic locus.                                                                                                                  | 10 |
| <b>Figure S5:</b> Schematic representation of the Human ASMT isoform 1.                                                                                                                   | 11 |
| <b>Figure S6:</b> Multiple alignment of the predicted exon 1 of <i>Asmt</i> in Cetacea.                                                                                                   | 11 |
| <b>Figure S7:</b> SRA validation for conserved frameshift mutation in exon 1 of <i>Asmt</i> in Cetacea.                                                                                   | 12 |
| <b>Figure S8:</b> Alignment of exon 5 of <i>Asmt</i> in multiple mammals.                                                                                                                 | 15 |
| <b>Figure S9:</b> SRA validation for frameshift mutation in exon 4 of <i>P. catodon Asmt</i> .                                                                                            | 16 |
| <b>Figure S10:</b> SRA validation for frameshift mutation in exon 3 of <i>L. obliquidens Asmt</i> .                                                                                       | 16 |
| <b>Figure S11:</b> Multiple alignment of the predicted <i>Mtnr1a</i> relic sequences (exon 1) in Cetacea.                                                                                 | 17 |
| <b>Figure S12:</b> SRA validation for 19 nucleotide deletion in exon 1 of <i>P. catodon Mtnr1a</i> .                                                                                      | 17 |
| <b>Figure S 3:</b> Comparative synteny maps of <i>Mtnr1b</i> genomic locus.                                                                                                               | 18 |
| <b>Figure S14:</b> Multiple alignment of the predicted exon 1 of <i>Mtnr1b</i> in Cetacea.                                                                                                | 19 |
| <b>Figure S15:</b> SRA validation for stop mutation in exon 1 of <i>Mtnr1b</i> from <i>O. orca</i> .                                                                                      | 19 |
| <b>Figure S16:</b> SRA validation for nucleotide insertion generating a premature stop mutation in exon 1 of the <i>Mtnr1b</i> gene from <i>B. acutorostrata</i> and <i>E. robustus</i> . | 20 |
| <b>Figure S17:</b> SRA validation for loss of start codon in exon 1 of the <i>Mtnr1b</i> gene from <i>L. obliquidens</i> .                                                                | 21 |
| <b>Figure S18:</b> Partial multiple alignment of the predicted exon 2 of <i>Mtnr1b</i> in Cetacea.                                                                                        | 21 |
| <b>Figure S19:</b> SRA validation for conserved nucleotide deletion in exon 2 of <i>Mtnr1b</i> in Cetacea.                                                                                | 22 |
| <b>Figure S20:</b> SRA validation for nucleotide deletion in exon 2 of <i>Mtnr1b</i> from <i>E. robustus</i> .                                                                            | 25 |
| <b>Figure S21:</b> <i>H. amphibius</i> exon 1 and 5 assembly.                                                                                                                             | 26 |
| <b>Figure S22:</b> Phylogenetic analysis of Perissodactyla, Artiodactyla and Primate <i>Aanat</i> genes.                                                                                  | 27 |
| <b>Figure S23:</b> Phylogenetic analysis of Perissodactyla, Artiodactyla and Primate <i>Mtnr1a</i> genes.                                                                                 | 28 |
| <b>Figure S24:</b> Phylogenetic analysis of Perissodactyla, Artiodactyla and Primate <i>Mtnr1b</i> genes.                                                                                 | 29 |
| <b>Figure S25:</b> <i>T. manatus latirostris</i> gene annotations.                                                                                                                        | 30 |
| <b>Figure S26:</b> SRA validation for loss of start codon in exon 1 of the <i>Aanat</i> gene from <i>T. manatus latirostris</i> .                                                         | 31 |
| <b>Figure S27:</b> SRA validation for premature stop codon in exon 5 of the <i>Asmt</i> gene from <i>T. manatus latirostris</i> .                                                         | 31 |
| <b>Figure S28:</b> SRA validation for single nucleotide insertion in exon 2 of the <i>Mtnr1a</i> gene from <i>T. manatus latirostris</i> .                                                | 32 |
| <b>Figure S29:</b> SRA validation for frameshift mutation in exon 2 of the <i>Mtnr1b</i> gene from <i>T. manatus latirostris</i> .                                                        | 32 |
| <b>Table S1:</b> Blast-n output of <i>Bos Taurus</i> and <i>Homo sapiens</i> sequences against the <i>H. amphibius</i> genome.                                                            | 33 |
| <b>Table S2:</b> Accession numbers of the <i>Aanat</i> orthologues sequences used in phylogenetic analyses.                                                                               | 34 |
| <b>Table S3:</b> Accession numbers of the <i>Mtnr1a</i> orthologues sequences used in phylogenetic analyses.                                                                              | 35 |
| <b>Table S4:</b> Accession numbers of the <i>Mtnr1b</i> orthologues sequences used in phylogenetic analyses.                                                                              | 36 |
| <b>Gene annotations:</b> In silico gene annotations of <i>Aanat</i> , <i>Mtnr1a</i> and <i>Mtnr1b</i> in <i>H. amphibius</i>                                                              | 37 |

# AANAT

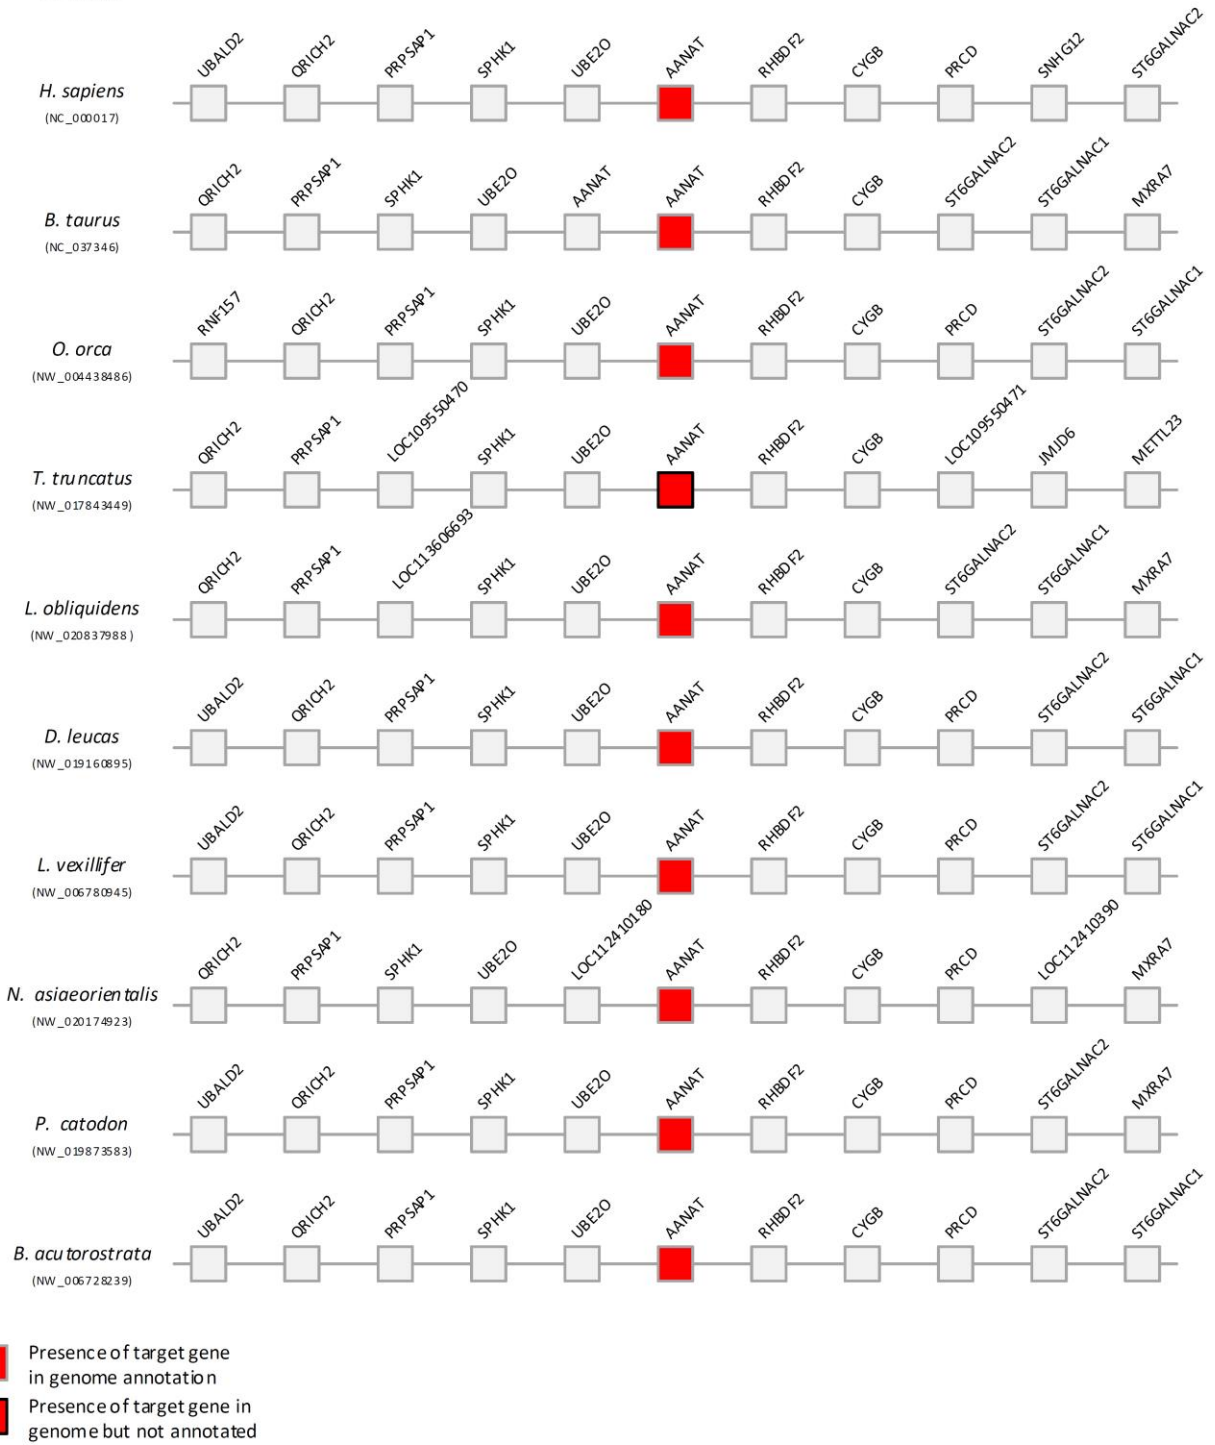

**Figure S1:** Comparative synteny maps of *Aanat* genomic locus.

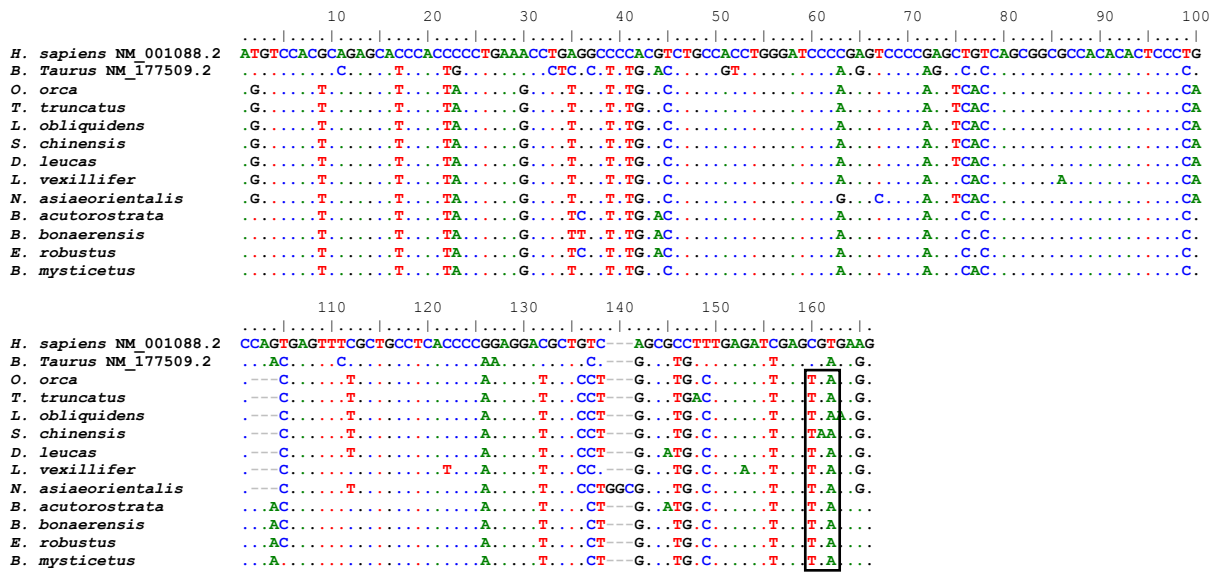

**Figure S2:** Multiple alignment of the predicted exon 1 of *Aanat* in the listed species. Conserved premature stop mutation, validated with SRA (when available), is represented in the corresponding position with a black arrow.

**Orcinus orca**

SRA serached

**SR1164379**- University of Durham 2014-02-13 **Sample ID:** SAMN02595096(AR-Genome)

**SR574978/81**- Baylor College of Medicine 2012-09-20 **Sample ID:** SAMN01180276 (AForca1)

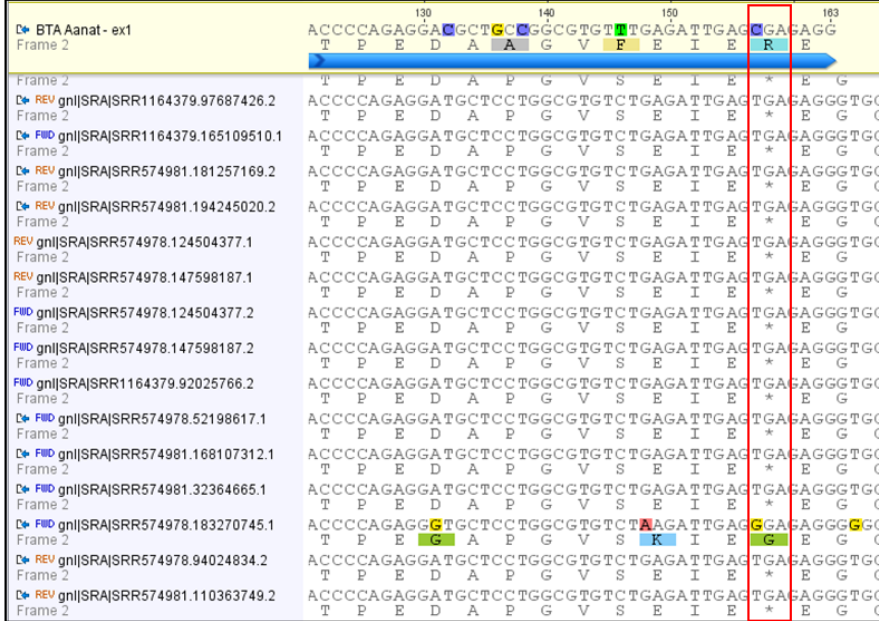

**Tursiops truncatus**

Trace Archive Blast

ti:1496398209

ti:1518196214

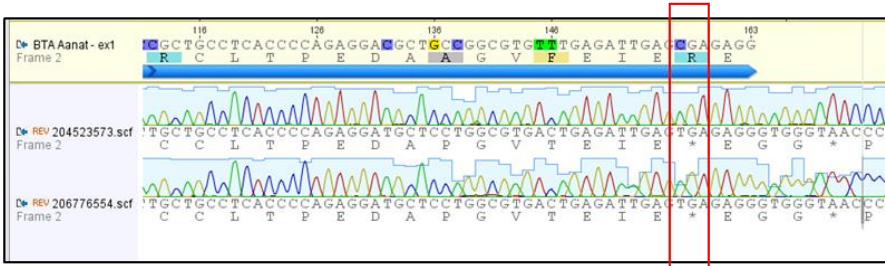

**Tursiops truncatus**

SRA searched

**SRR606320/21/22/24** - Baylor College of Medicine 2015-07-22 **Sample ID: SAMN0000070**

**SRR2148843** - Beijing Genome Institute 2016-08-10 **Sample ID: SAMN03968477**

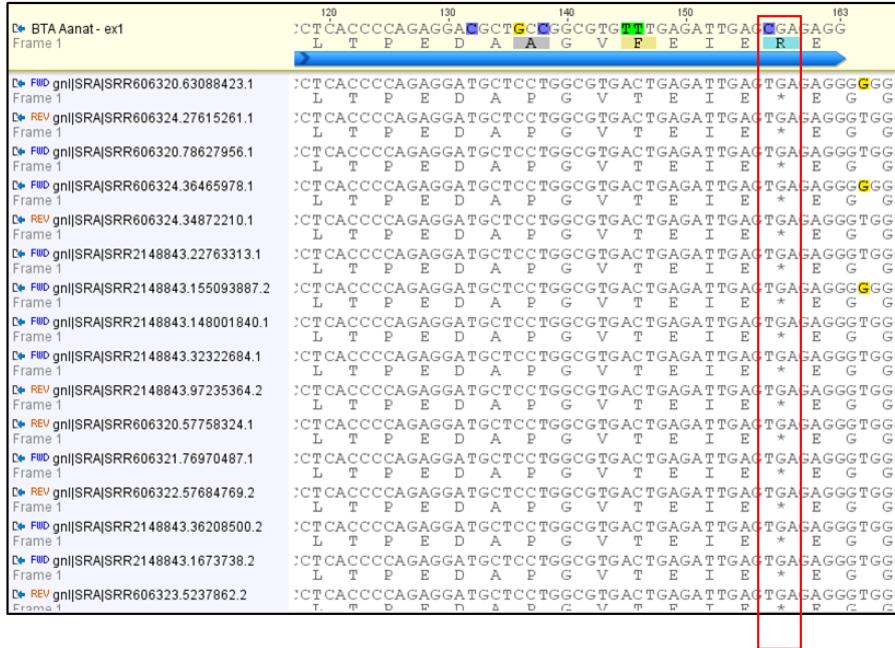

**Lagenorhynchus obliquidens**

SRA searched

**SRR7349574** - BC Cancer Agency Michael Smith Genome Sciences Centre (BCAGSC) 2018-06-21 **Sample ID: SAMN09386610**

**SRR7345555** - BC Cancer Agency Michael Smith Genome Sciences Centre (BCAGSC) 2018-06-21 **Sample ID: SAMN09386610**

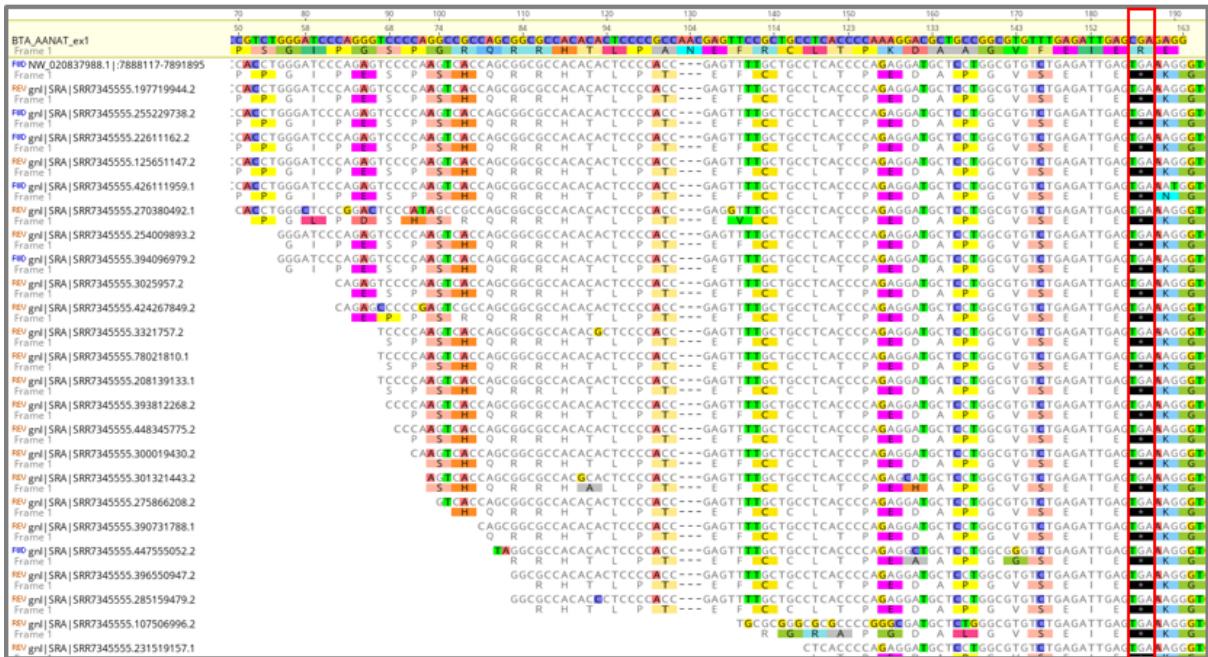

**Delphinapterus leucas**

SRA searched

**SRR5197962** - BC Cancer Agency Michael Smith Genome Sciences Centre 2017-06-27 **Sample ID: SAMN06217832** (Qila21)

**SRR5659909** - BC Cancer Agency Michael Smith Genome Sciences Centre 2017-06-27 **Sample ID: SAMN06216270** (Aurora29)

| Accession                                     | Sequence                                                                           |
|-----------------------------------------------|------------------------------------------------------------------------------------|
| BTA Aanat - ex1<br>Frame 3                    | ACCCACAGAGGAGCGCTGCGCGCGTGTGTGAGATTGAGCGAGAGG<br>T P E D A A G V F E I E R E       |
| REV gnl SRA SRR5197962.313848039.2<br>Frame 3 | ACCCACAGAGGATGCTCCTGGCATGCTGAGATTGAGTGAAGGGTGGG<br>T P E D A P G M S E I E * E G G |
| FWD gnl SRA SRR5197962.336869691.2<br>Frame 3 | ACCCACAGAGGATGCTCCTGGCATGCTGAGATTGAGTGAAGGGTGGG<br>T P E D A P G M S E I E * E G G |
| FWD gnl SRA SRR5197962.143076514.2<br>Frame 3 | ACCCACAGAGGATGCTCCTGGCATGCTGAGATTGAGTGAAGGGTGGG<br>T P E D A P G M S E I E * E G G |
| FWD gnl SRA SRR5659909.275376799.3<br>Frame 3 | ACCCACAGAGGATGCTCCTGGCATGCTGAGATTGAGTGAAGGGTGGG<br>T P E D A P G M S E I E * E G G |
| FWD gnl SRA SRR5659909.275377479.3<br>Frame 3 | ACCCACAGAGGATGCTCCTGGCATGCTGAGATTGAGTGAAGGGTGGG<br>T P E D A P G M S E I E * E G G |
| FWD gnl SRA SRR5659909.275384071.3<br>Frame 3 | ACCCACAGAGGATGCTCCTGGCATGCTGAGATTGAGTGAAGGGTGGG<br>T P E D A P G M S E I E * E G G |
| REV gnl SRA SRR5197962.196691459.1<br>Frame 3 | ACCCACAGAGGATGCTCCTGGCATGCTGAGATTGAGTGAAGGGTGGG<br>T P E D A P G M S E I E * E G G |
| FWD gnl SRA SRR5659909.88588086.3<br>Frame 3  | ACCCACAGAGGATGCTCCTGGCATGCTGAGATTGAGTGAAGGGTGGG<br>T P E D A P G M S E I E * E G G |
| REV gnl SRA SRR5197962.134309602.1<br>Frame 3 | ACCCACAGAGGATGCTCCTGGCATGCTGAGATTGAGTGAAGGGTGGG<br>T P E D A P G M S E I E * E G G |
| REV gnl SRA SRR5197962.143517536.1<br>Frame 3 | ACCCACAGAGGATGCTCCTGGCATGCTGAGATTGAGTGAAGGGTGGG<br>T P E D A P G M S E I E * E G G |
| REV gnl SRA SRR5659909.135106851.3<br>Frame 3 | ACCCACAGAGGATGCTCCTGGCATGCTGAGATTGAGTGAAGGGTGGG<br>T P E D A P G M S E I E * E G G |
| FWD gnl SRA SRR5659909.253127781.1<br>Frame 3 | ACCCACAGAGGATGCTCCTGGCATGCTGAGATTGAGTGAAGGGTGGG<br>T P E D A P G M S E I E * E G G |
| FWD gnl SRA SRR5659909.435591840.3<br>Frame 3 | ACCCACAGAGGATGCTCCTGGCATGCTGAGATTGAGTGAAGGGTGGG<br>T P E D A P G M S E I E * E G G |
| REV gnl SRA SRR5659909.181457647.1<br>Frame 3 | ACCCACAGAGGATGCTCCTGGCATGCTGAGATTGAGTGAAGGGTGGG<br>T P E D A P G M S E I E * E G G |
| REV gnl SRA SRR5197962.322478472.2<br>Frame 3 | ACCCACAGAGGATGCTCCTGGCATGCTGAGATTGAGTGAAGGGTGGG<br>T P E D A P G M S E I E * E G G |
| REV gnl SRA SRR5197962.127826677.2<br>Frame 3 | ACCCACAGAGGATGCTCCTGGCATGCTGAGATTGAGTGAAGGGTGGG<br>T P E D A P G M S E I E * E G G |

**Neophocaena asiaorientalis**

SRA searched

**SRR6923830** - Northwestern Polytechnical University 2018-04-08 **Sample ID: SAMN08512128** (MCJT3)

**SRR4292276** - Beijing Genome Institute (BGI) 2017-09-23 **Sample ID: SAMN05818630**

| Accession                                     | Sequence                                                                                    |
|-----------------------------------------------|---------------------------------------------------------------------------------------------|
| BTA Aanat - ex1<br>Frame 1                    | ACCCACAGAGGAGCGCTGCGCGCGTGTGTGAGATTGAGCGAGAGG<br>T P E D A A G V F E I E R E                |
| FWD NW_020174923.1:7887000-7891000<br>Frame 1 | ACCCACAGAGGATGCTCCTGGCGCGTGTGTGAGATTGAGTGAAGGGTGGGCA<br>T P E D A P G G V S E I E * E G G Q |
| REV gnl SRA SRR6923830.203433274.2<br>Frame 1 | ACCCACAGAGGATGCTCCTGGCGCGTGTGTGAGATTGAGTGAAGGGTGGGCA<br>T P E D A P G G V S E I E * E G G Q |
| FWD gnl SRA SRR6923830.203433274.1<br>Frame 1 | ACCCACAGAGGATGCTCCTGGCGCGTGTGTGAGATTGAGTGAAGGGTGGGCA<br>T P E D A P G G V S E I E * E G G Q |
| FWD gnl SRA SRR6923830.17914340.1<br>Frame 1  | ACCCACAGAGGATGCTCCTGGCGCGTGTGTGAGATTGAGTGAAGGGTGGGCA<br>T P E D A P G G V S E I E * E G G Q |
| FWD gnl SRA SRR6923830.17935068.1<br>Frame 1  | ACCCACAGAGGATGCTCCTGGCGCGTGTGTGAGATTGAGTGAAGGGTGGGCA<br>T P E D A P G G V S E I E * E G G Q |
| FWD gnl SRA SRR6923830.138048032.1<br>Frame 1 | ACCCACAGAGGATGCTCCTGGCGCGTGTGTGAGATTGAGTGAAGGGTGGGCA<br>T P E D A P G G V S E I E * E G G Q |
| REV gnl SRA SRR6923830.221582219.1<br>Frame 1 | ACCCACAGAGGATGCTCCTGGCGCGTGTGTGAGATTGAGTGAAGGGTGGGCA<br>T P E D A P G G V S E I E * E G G Q |
| REV gnl SRA SRR6923830.87936886.1<br>Frame 1  | ACCCACAGAGGATGCTCCTGGCGCGTGTGTGAGATTGAGTGAAGGGTGGGCA<br>T P E D A P G G V S E I E * E G G Q |
| REV gnl SRA SRR6923830.122664477.1<br>Frame 1 | ACCCACAGAGGATGCTCCTGGCGCGTGTGTGAGATTGAGTGAAGGGTGGGCA<br>T P E D A P G G V S E I E * E G G Q |
| REV gnl SRA SRR4292276.90179376.2<br>Frame 1  | ACCCACAGAGGATGCTCCTGGCGCGTGTGTGAGATTGAGTGAAGGGTGGGCA<br>T P E D A P G G V S E I E * E G G Q |
| REV gnl SRA SRR4292276.151941669.2<br>Frame 1 | ACCCACAGAGGATGCTCCTGGCGCGTGTGTGAGATTGAGTGAAGGGTGGGCA<br>T P E D A P G G V S E I E * E G G Q |
| FWD gnl SRA SRR6923830.161093567.1<br>Frame 1 | ACCCACAGAGGATGCTCCTGGCGCGTGTGTGAGATTGAGTGAAGGGTGGGCA<br>T P E D A P G G V S E I E * E G G Q |
| FWD gnl SRA SRR6923830.221582219.2<br>Frame 1 | ACCCACAGAGGATGCTCCTGGCGCGTGTGTGAGATTGAGTGAAGGGTGGGCA<br>T P E D A P G G V S E I E * E G G Q |
| FWD gnl SRA SRR6923830.122664477.2<br>Frame 1 | ACCCACAGAGGATGCTCCTGGCGCGTGTGTGAGATTGAGTGAAGGGTGGGCA<br>T P E D A P G G V S E I E * E G G Q |
| FWD gnl SRA SRR6923830.87936886.2<br>Frame 1  | ACCCACAGAGGATGCTCCTGGCGCGTGTGTGAGATTGAGTGAAGGGTGGGCA<br>T P E D A P G G V S E I E * E G G Q |
| REV gnl SRA SRR4292276.115409536.2<br>Frame 1 | ACCCACAGAGGATGCTCCTGGCGCGTGTGTGAGATTGAGTGAAGGGTGGGCA<br>T P E D A P G G V S E I E * E G G Q |
| FWD gnl SRA SRR4292276.136132707.1<br>Frame 1 | ACCCACAGAGGATGCTCCTGGCGCGTGTGTGAGATTGAGTGAAGGGTGGGCA<br>T P E D A P G G V S E I E * E G G Q |
| FWD gnl SRA SRR4292276.138797031.1<br>Frame 1 | ACCCACAGAGGATGCTCCTGGCGCGTGTGTGAGATTGAGTGAAGGGTGGGCA<br>T P E D A P G G V S E I E * E G G Q |
| FWD gnl SRA SRR4292276.141886821.1<br>Frame 1 | ACCCACAGAGGATGCTCCTGGCGCGTGTGTGAGATTGAGTGAAGGGTGGGCA<br>T P E D A P G G V S E I E * E G G Q |
| FWD gnl SRA SRR4292276.61881861.2<br>Frame 1  | ACCCACAGAGGATGCTCCTGGCGCGTGTGTGAGATTGAGTGAAGGGTGGGCA<br>T P E D A P G G V S E I E * E G G Q |
| REV gnl SRA SRR6923830.338238067.1<br>Frame 1 | ACCCACAGAGGATGCTCCTGGCGCGTGTGTGAGATTGAGTGAAGGGTGGGCA<br>T P E D A P G G V S E I E * E G G Q |
| FWD gnl SRA SRR4292276.80447047.1<br>Frame 1  | ACCCACAGAGGATGCTCCTGGCGCGTGTGTGAGATTGAGTGAAGGGTGGGCA<br>T P E D A P G G V S E I E * E G G Q |

**Balaenoptera acutorostrata**

SRA searched

**SRR924087**- Korea Institute of Ocean Science and Technology 2013-10-31 **Sample ID:** SAMN02192644 (MinkeWhale-01)

**SRR1802582** - Seoul National University 2016-02-11 **Sample ID:** SAMN03339797 (MW30)

CGCTGCCTCACCCAGAGGATGCTGCTGGCGTGTGTGAGATTGAGCGAGAGG  
R C L T P E D A A G V S E I E \* R E

Frame 1  
P E D A A  
P E D A A  
P E D A A  
P E D A A G M  
P E D A A G M S E  
P E D A A G M S E  
P E D A A G M S E I  
P E D A A G M S E I E  
P E D A A G M S E I E \* E  
P E D A A G M S E I E \* E G G  
P E D A A G M S E I E \* E G G  
P E D A A G M S E I E \* E G G  
P E D A A G M S E I E \* E G G  
P E D A A G M S E I E \* E G G  
P E D A A G M S E I E \* E G G  
P E D A A G M S E I E \* E G G  
P E D A A G M S E I E \* E G G

**Balaenoptera bonaerensis**

SRA searched

**SRR4011113**- Institute of Marine Research 2016-08-13 **Sample ID:** SAMN05447715

CGCTGCCTCACCCAGAGGATGCTGCTGGCGTGTGTGAGATTGAGCGAGAGG  
R C L T P E D A A G V S E I E \* R E

Frame 1  
R C L T P E D A A G V S E I E \*  
R C L T P E D A A G V S E I E \*  
R C L T P E D A A G V S E I E \*  
R C L T P E D A A G V S E I E \*  
R C L T P E D A A G V S E I E \*  
R C L T P E D A A G V S E I E \*  
R C L T P E D A A G V S E I E \*  
R C L T P E D A A G V S E I E \*  
R C L T P E D A A G V S E I E \*  
R C L T P E D A A G V S E I E \*  
R C L T P E D A A G V S E I E \*  
R C L T P E D A A G V S E I E \*  
R C L T P E D A A G V S E I E \*  
R C L T P E D A A G V S E I E \*  
R C L T P E D A A G V S E I E \*



***Eschrichtius robustus***

SRA searched

**SRR5495100** - Purdue University 2017-05-02 **Sample ID: SAMN06837694** (GFD-02 -female)

**SRR5495108** - Purdue University 2017-05-02 **Sample ID: SAMN06837692** (ER-14-168 -male)

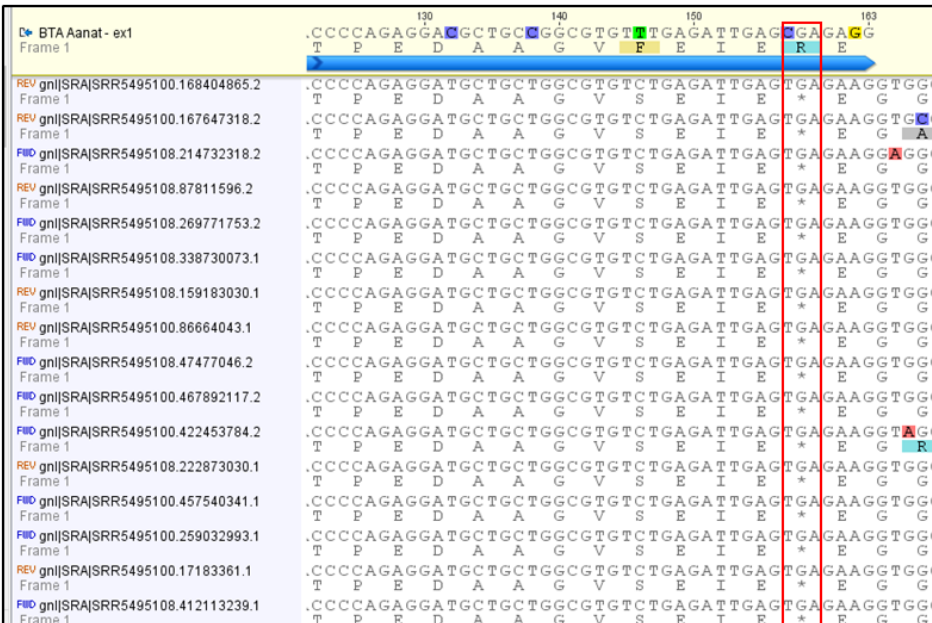

***Balaena mysticetus***

SRA searched

**SRR1685383** - University of Liverpool 2014-12-31 **Sample ID: SAMN03225705** (bowhead whale1)

**SRR1685385** - University of Liverpool 2014-12-31 **Sample ID: SAMN03225705** (bowhead whale1)

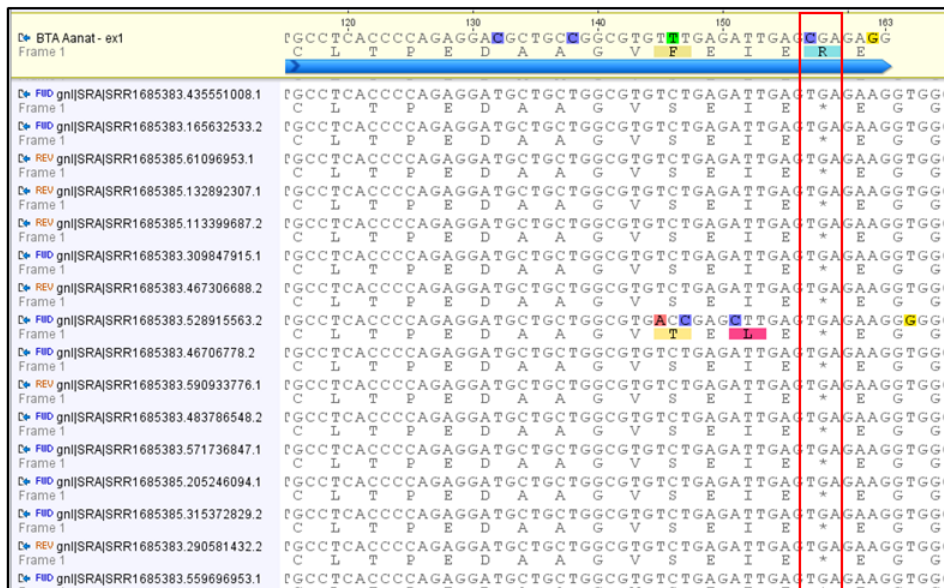

**Figure S3:** SRA validation for conserved stop mutation (red box) in exon 1 of the *Aanat* gene from *O. orca*, *T. truncatus*, *L. obliquidens*, *D. leucas*, *N. asiaeorientalis*, *B. acutorostrata*, *B. bonaerensis*, *E. robustus* and *B. mysticetus*.

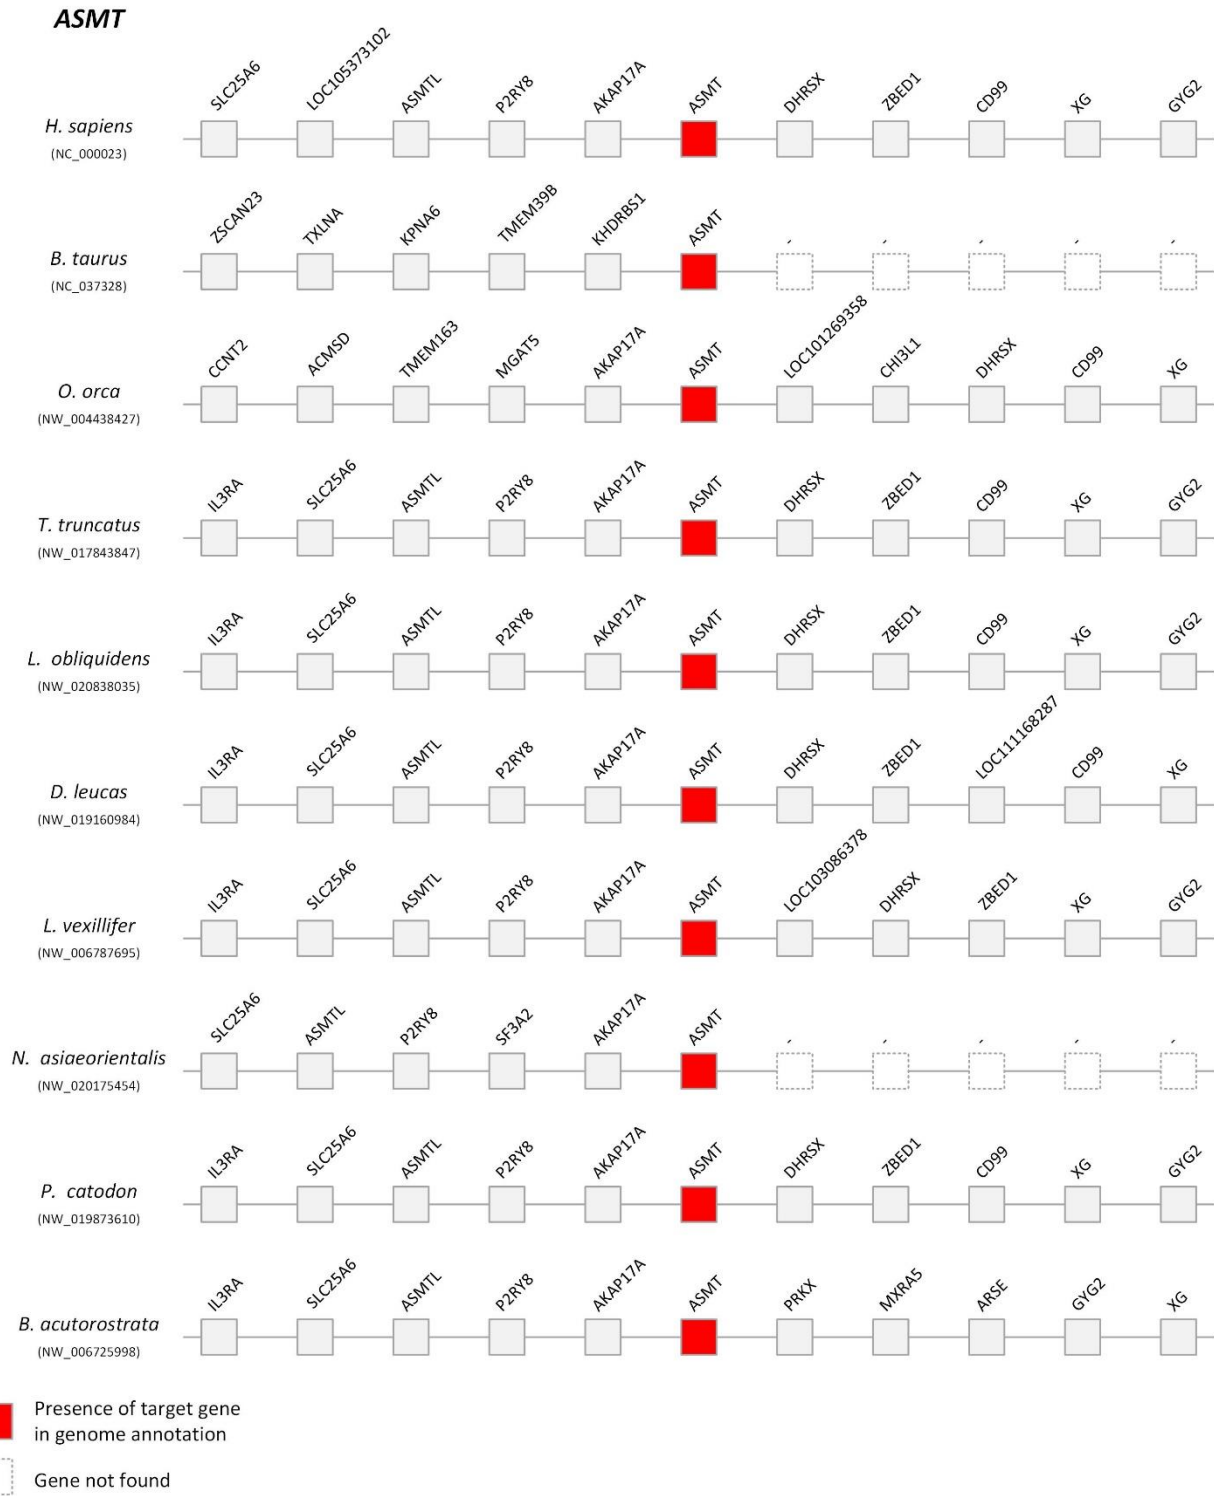

**Figure S4:** Comparative synteny maps of *Asmt* genomic locus.

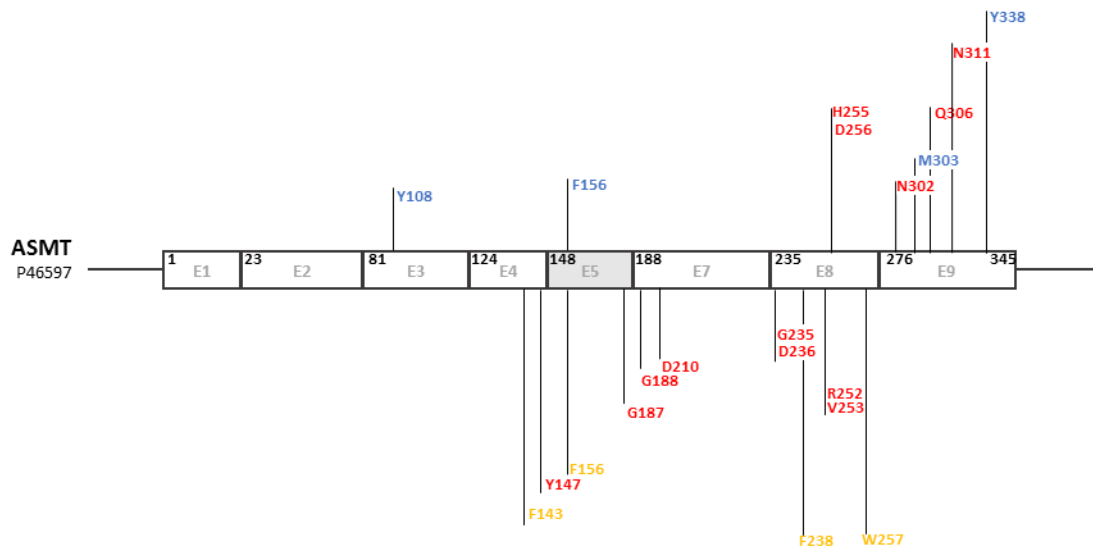

**Figure S5:** Schematic representation of the Human ASMT isoform 1 (not to scale). On top, in blue, relative location of conserved residues in proximity to the hydroxyl side of *N*-acetyl serotonin (NAS), in red residues that establish H-bonds to NAS. On the bottom in orange conserved aromatic residues that encircle the SAM binding site, in red residues that establish H-Bonds to SAM.

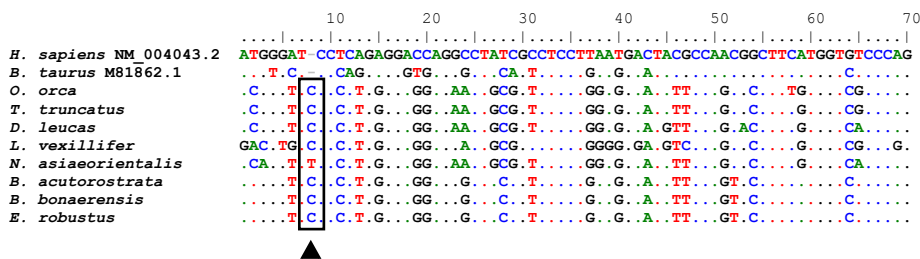

**Figure S6:** Multiple alignment of the predicted exon 1 of *Asmt* in the listed species. Conserved single nucleotide insertion, validated with SRA (when available), is represented in the corresponding position with a black arrow.

**Orcinus orca**

SRA searched

**SRR1164379** - University of Durham 2014-02-13 **Sample ID: SAMN02595096** (AR-Genome)

**SRR574977/82** - Baylor College of Medicine 2012-09-20 **Sample ID: SAMN01180276** (AForca1)

| Accession                           | Sequence                                                                         |
|-------------------------------------|----------------------------------------------------------------------------------|
| BTANM_177493.2 EX1                  | ATGGCTCC...TAGGAGGCGAGGCGCTACAGTCTCCTGAGGAATAGCCACCGCTTCATGGTCCCAAG              |
| REV NW_004438427.1:c7858292-7702561 | CTGGAGGGAAGACGGGTTC...CTGGGGAGGAGAAGTCCGGTCTCCTGGAGGAATATCCAGCGCCTTGTGGTCCGCAAGG |
| REV gnl SRA SRR1164379.130166887.1  | CTGGAGGGAAGACGGGTTC...CTGGGGAGGAGAAGTCCGGTCTCCTGGAGGAATATCCAGCGCCTTGTGGTCCGCAAGG |
| REV gnl SRA SRR1164379.34997561.1   | CTGGAGGGAAGACGGGTTC...CTGGGGAGGAGAAGTCCGGTCTCCTGGAGGAATATCCAGCGCCTTGTGGTCCGCAAGG |
| REV gnl SRA SRR1164379.169772060.1  | CTGGAGGGAAGACGGGTTC...CTGGGGAGGAGAAGTCCGGTCTCCTGGAGGAATATCCAGCGCCTTGTGGTCCGCAAGG |
| REV gnl SRA SRR1164379.130166887.1  | CTGGAGGGAAGACGGGTTC...CTGGGGAGGAGAAGTCCGGTCTCCTGGAGGAATATCCAGCGCCTTGTGGTCCGCAAGG |
| REV gnl SRA SRR1164379.56907859.1   | CTGGAGGGAAGACGGGTTC...CTGGGGAGGAGAAGTCCGGTCTCCTGGAGGAATATCCAGCGCCTTGTGGTCCGCAAGG |
| REV gnl SRA SRR1164379.182343618.1  | CTGGAGGGAAGACGGGTTC...CTGGGGAGGAGAAGTCCGGTCTCCTGGAGGAATATCCAGCGCCTTGTGGTCCGCAAGG |
| REV gnl SRA SRR574977.14178689.1    | CTGGAGGGAAGACGGGTTC...CTGGGGAGGAGAAGTCCGGTCTCCTGGAGGAATATCCAGCGCCTTGTGGTCCGCAAGG |
| REV gnl SRA SRR574982.43781177.1    | CTGGAGGGAAGACGGGTTC...CTGGGGAGGAGAAGTCCGGTCTCCTGGAGGAATATCCAGCGCCTTGTGGTCCGCAAGG |
| REV gnl SRA SRR574977.9455706.2     | CTGGAGGGAAGACGGGTTC...CTGGGGAGGAGAAGTCCGGTCTCCTGGAGGAATATCCAGCGCCTTGTGGTCCGCAAGG |
| REV gnl SRA SRR574982.578231559.1   | CTGGAGGGAAGACGGGTTC...CTGGGGAGGAGAAGTCCGGTCTCCTGGAGGAATATCCAGCGCCTTGTGGTCCGCAAGG |
| REV gnl SRA SRR574982.40348974.2    | CTGGAGGGAAGACGGGTTC...CTGGGGAGGAGAAGTCCGGTCTCCTGGAGGAATATCCAGCGCCTTGTGGTCCGCAAGG |
| REV gnl SRA SRR574982.39558494.1    | CTGGAGGGAAGACGGGTTC...CTGGGGAGGAGAAGTCCGGTCTCCTGGAGGAATATCCAGCGCCTTGTGGTCCGCAAGG |
| REV gnl SRA SRR574982.31247196.1    | CTGGAGGGAAGACGGGTTC...CTGGGGAGGAGAAGTCCGGTCTCCTGGAGGAATATCCAGCGCCTTGTGGTCCGCAAGG |
| REV gnl SRA SRR574982.23324439.2    | CTGGAGGGAAGACGGGTTC...CTGGGGAGGAGAAGTCCGGTCTCCTGGAGGAATATCCAGCGCCTTGTGGTCCGCAAGG |
| REV gnl SRA SRR574977.67172143.2    | CTGGAGGGAAGACGGGTTC...CTGGGGAGGAGAAGTCCGGTCTCCTGGAGGAATATCCAGCGCCTTGTGGTCCGCAAGG |
| REV gnl SRA SRR574977.5567757.1     | CTGGAGGGAAGACGGGTTC...CTGGGGAGGAGAAGTCCGGTCTCCTGGAGGAATATCCAGCGCCTTGTGGTCCGCAAGG |
| REV gnl SRA SRR574977.31366241.1    | CTGGAGGGAAGACGGGTTC...CTGGGGAGGAGAAGTCCGGTCTCCTGGAGGAATATCCAGCGCCTTGTGGTCCGCAAGG |
| REV gnl SRA SRR574977.26800153.1    | CTGGAGGGAAGACGGGTTC...CTGGGGAGGAGAAGTCCGGTCTCCTGGAGGAATATCCAGCGCCTTGTGGTCCGCAAGG |
| REV gnl SRA SRR574982.122716857.1   | CTGGAGGGAAGACGGGTTC...CTGGGGAGGAGAAGTCCGGTCTCCTGGAGGAATATCCAGCGCCTTGTGGTCCGCAAGG |
| REV gnl SRA SRR574982.119918119.2   | CTGGAGGGAAGACGGGTTC...CTGGGGAGGAGAAGTCCGGTCTCCTGGAGGAATATCCAGCGCCTTGTGGTCCGCAAGG |
| REV gnl SRA SRR574982.117739335.1   | CTGGAGGGAAGACGGGTTC...CTGGGGAGGAGAAGTCCGGTCTCCTGGAGGAATATCCAGCGCCTTGTGGTCCGCAAGG |
| REV gnl SRA SRR574982.78332641.1    | CTGGAGGGAAGACGGGTTC...CTGGGGAGGAGAAGTCCGGTCTCCTGGAGGAATATCCAGCGCCTTGTGGTCCGCAAGG |
| REV gnl SRA SRR574982.68487631.2    | CTGGAGGGAAGACGGGTTC...CTGGGGAGGAGAAGTCCGGTCTCCTGGAGGAATATCCAGCGCCTTGTGGTCCGCAAGG |

**Tursiops truncatus**

SRA searched

**SRR5125024** - National Institute of Standards and Technology 2016-12-27 **Sample ID: SAMN06114300**

**SRR606319/20/21/22/24** - Baylor College of Medicine 2015-07-22 **Sample ID: SAMN00000070**

**SRR2148845** - Beijing Genome Institute 2016-08-10 **Sample ID: SAMN03968479**

| Accession                          | Sequence                                                                             |
|------------------------------------|--------------------------------------------------------------------------------------|
| BTANM_177493.2 EX1                 | ATGGCTCC...TAGGAGGCGAGGCGCTACAGTCTCCTGAGGAATAGCCACCGCTTCATGGTCCCAAG                  |
| REV NW_017843847.1:c996537-829636  | CTGGCTGGAGGGAAGACGGGTTC...CTGGGGAGGAGAAGTCCGGTCTCCTGGAGGAATATCCAGCGCCTTGTGGTCCGCAAGG |
| REV gnl SRA SRR5125024.114636256.1 | CTGGCTGGAGGGAAGACGGGTTC...CTGGGGAGGAGAAGTCCGGTCTCCTGGAGGAATATCCAGCGCCTTGTGGTCCGCAAGG |
| REV gnl SRA SRR5125024.6902127.1   | CTGGCTGGAGGGAAGACGGGTTC...CTGGGGAGGAGAAGTCCGGTCTCCTGGAGGAATATCCAGCGCCTTGTGGTCCGCAAGG |
| REV gnl SRA SRR5125024.45501041.2  | CTGGCTGGAGGGAAGACGGGTTC...CTGGGGAGGAGAAGTCCGGTCTCCTGGAGGAATATCCAGCGCCTTGTGGTCCGCAAGG |
| REV gnl SRA SRR606319.45788714.1   | CTGGCTGGAGGGAAGACGGGTTC...CTGGGGAGGAGAAGTCCGGTCTCCTGGAGGAATATCCAGCGCCTTGTGGTCCGCAAGG |
| REV gnl SRA SRR606319.64109226.1   | CTGGCTGGAGGGAAGACGGGTTC...CTGGGGAGGAGAAGTCCGGTCTCCTGGAGGAATATCCAGCGCCTTGTGGTCCGCAAGG |
| REV gnl SRA SRR606319.32549221.2   | CTGGCTGGAGGGAAGACGGGTTC...CTGGGGAGGAGAAGTCCGGTCTCCTGGAGGAATATCCAGCGCCTTGTGGTCCGCAAGG |
| REV gnl SRA SRR606321.34858384.2   | CTGGCTGGAGGGAAGACGGGTTC...CTGGGGAGGAGAAGTCCGGTCTCCTGGAGGAATATCCAGCGCCTTGTGGTCCGCAAGG |
| REV gnl SRA SRR5125024.71308741.2  | CTGGCTGGAGGGAAGACGGGTTC...CTGGGGAGGAGAAGTCCGGTCTCCTGGAGGAATATCCAGCGCCTTGTGGTCCGCAAGG |
| REV gnl SRA SRR5125024.56882281.2  | CTGGCTGGAGGGAAGACGGGTTC...CTGGGGAGGAGAAGTCCGGTCTCCTGGAGGAATATCCAGCGCCTTGTGGTCCGCAAGG |
| REV gnl SRA SRR2148845.39234458.2  | CTGGCTGGAGGGAAGACGGGTTC...CTGGGGAGGAGAAGTCCGGTCTCCTGGAGGAATATCCAGCGCCTTGTGGTCCGCAAGG |
| REV gnl SRA SRR5125024.61353609.2  | CTGGCTGGAGGGAAGACGGGTTC...CTGGGGAGGAGAAGTCCGGTCTCCTGGAGGAATATCCAGCGCCTTGTGGTCCGCAAGG |
| REV gnl SRA SRR2148845.136891676.2 | CTGGCTGGAGGGAAGACGGGTTC...CTGGGGAGGAGAAGTCCGGTCTCCTGGAGGAATATCCAGCGCCTTGTGGTCCGCAAGG |
| REV gnl SRA SRR606324.48861967.2   | CTGGCTGGAGGGAAGACGGGTTC...CTGGGGAGGAGAAGTCCGGTCTCCTGGAGGAATATCCAGCGCCTTGTGGTCCGCAAGG |
| REV gnl SRA SRR606322.86648277.2   | CTGGCTGGAGGGAAGACGGGTTC...CTGGGGAGGAGAAGTCCGGTCTCCTGGAGGAATATCCAGCGCCTTGTGGTCCGCAAGG |
| REV gnl SRA SRR5125024.115567367.2 | CTGGCTGGAGGGAAGACGGGTTC...CTGGGGAGGAGAAGTCCGGTCTCCTGGAGGAATATCCAGCGCCTTGTGGTCCGCAAGG |
| REV gnl SRA SRR5125024.91035709.1  | CTGGCTGGAGGGAAGACGGGTTC...CTGGGGAGGAGAAGTCCGGTCTCCTGGAGGAATATCCAGCGCCTTGTGGTCCGCAAGG |
| REV gnl SRA SRR2148845.136274553.2 | CTGGCTGGAGGGAAGACGGGTTC...CTGGGGAGGAGAAGTCCGGTCTCCTGGAGGAATATCCAGCGCCTTGTGGTCCGCAAGG |
| REV gnl SRA SRR606321.64782648.1   | CTGGCTGGAGGGAAGACGGGTTC...CTGGGGAGGAGAAGTCCGGTCTCCTGGAGGAATATCCAGCGCCTTGTGGTCCGCAAGG |
| REV gnl SRA SRR606320.14035397.2   | CTGGCTGGAGGGAAGACGGGTTC...CTGGGGAGGAGAAGTCCGGTCTCCTGGAGGAATATCCAGCGCCTTGTGGTCCGCAAGG |
| REV gnl SRA SRR606319.9519913.1    | CTGGCTGGAGGGAAGACGGGTTC...CTGGGGAGGAGAAGTCCGGTCTCCTGGAGGAATATCCAGCGCCTTGTGGTCCGCAAGG |
| REV gnl SRA SRR5125024.16925930.1  | CTGGCTGGAGGGAAGACGGGTTC...CTGGGGAGGAGAAGTCCGGTCTCCTGGAGGAATATCCAGCGCCTTGTGGTCCGCAAGG |
| REV gnl SRA SRR2148845.153370403.1 | CTGGCTGGAGGGAAGACGGGTTC...CTGGGGAGGAGAAGTCCGGTCTCCTGGAGGAATATCCAGCGCCTTGTGGTCCGCAAGG |
| REV gnl SRA SRR606324.82510474.2   | CTGGCTGGAGGGAAGACGGGTTC...CTGGGGAGGAGAAGTCCGGTCTCCTGGAGGAATATCCAGCGCCTTGTGGTCCGCAAGG |
| REV gnl SRA SRR606320.3030855.1    | CTGGCTGGAGGGAAGACGGGTTC...CTGGGGAGGAGAAGTCCGGTCTCCTGGAGGAATATCCAGCGCCTTGTGGTCCGCAAGG |
| REV gnl SRA SRR606319.4787579.2    | CTGGCTGGAGGGAAGACGGGTTC...CTGGGGAGGAGAAGTCCGGTCTCCTGGAGGAATATCCAGCGCCTTGTGGTCCGCAAGG |
| REV gnl SRA SRR606320.31081650.1   | CTGGCTGGAGGGAAGACGGGTTC...CTGGGGAGGAGAAGTCCGGTCTCCTGGAGGAATATCCAGCGCCTTGTGGTCCGCAAGG |

**Tursiops truncatus**  
Trace Archive Blast  
ti:1416172502

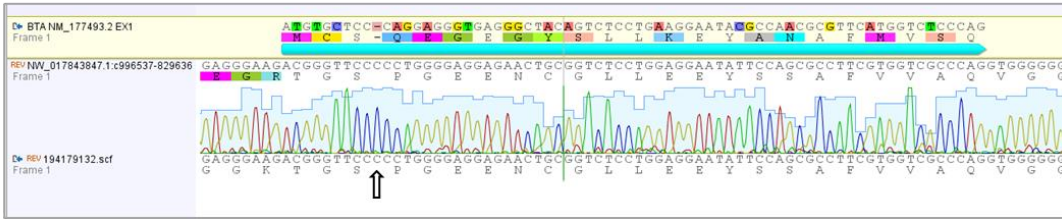

**Delphinapterus leucas**

SRA searched

**SRR5197962** - BC Cancer Agency Michael Smith Genome Sciences Centre 2017-06-27 Sample ID: SAMN06217832 (Qila21)

**SRR5197961** - BC Cancer Agency Michael Smith Genome Sciences Centre 2017-06-27 Sample ID: SAMN06216270 (Aurora29)

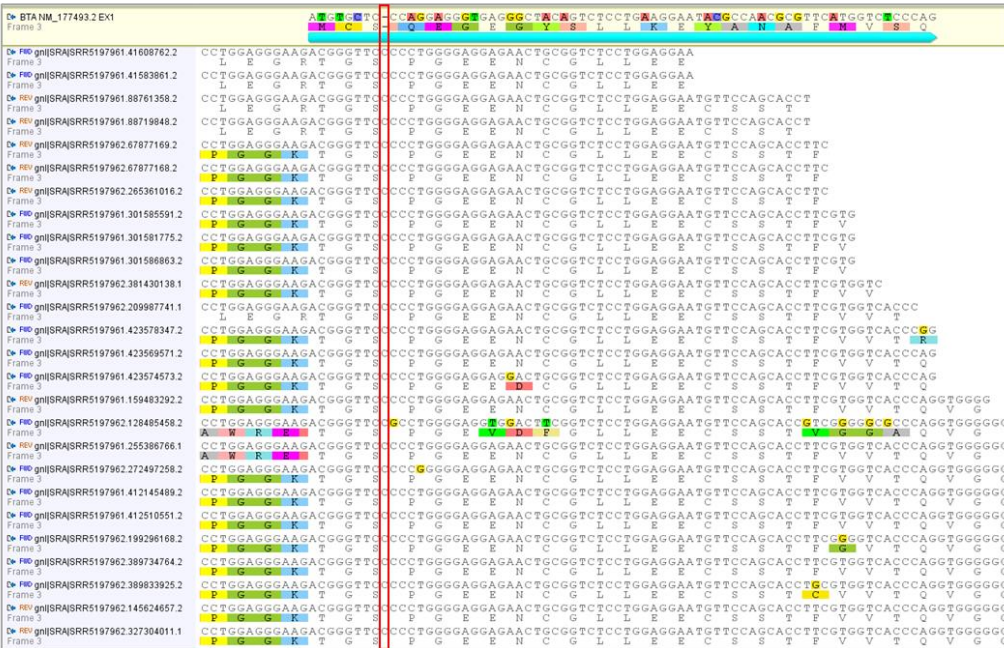

**Neophocaena asiaeorientalis**

SRA searched

**SRR6923830** - Northwestern Polytechnical University 2018-04-08 **Sample ID:** SAMN08512128 (MCJT3)

**SRR4292276** - Beijing Genome Institute (BGI) 2017-09-23 **Sample ID:** SAMN05818630

| Accession                            | Sequence                                                                        |
|--------------------------------------|---------------------------------------------------------------------------------|
| D: BTANM_177493.2 EX1                | ATCCAGGAGGAGGGGCTACTCTCCTGAAGGAATACCCACAGCGCTTCATGGTCTCCAG                      |
| FRN NW_020175454.1:c118000-90000     | CTGGAGGGAAGACGGGTTCCTGGGGAGGAGAACTCGGCTCCTGGAGGAATATCCAGCGCCTCGGGTCAACCCAGGTGGG |
| D: FRN gnl SRA SR4292276.192245892.2 | CTGGAGGGAAGACGGGTTCCTGGGGAGGAGAACTCGGCTCCTGGAGGAATATCCAGCGCCTCGGGTCAACCCAGGTGGG |
| D: FRN gnl SRA SR6923830.262892488.1 | CTGGAGGGAAGACGGGTTCCTGGGGAGGAGAACTCGGCTCCTGGAGGAATATCCAGCGCCTCGGGTCAACCCAGGTGGG |
| D: FRN gnl SRA SR6923830.120016636.2 | CTGGAGGGAAGACGGGTTCCTGGGGAGGAGAACTCGGCTCCTGGAGGAATATCCAGCGCCTCGGGTCAACCCAGGTGGG |
| D: FRN gnl SRA SR6923830.201831429.1 | CTGGAGGGAAGACGGGTTCCTGGGGAGGAGAACTCGGCTCCTGGAGGAATATCCAGCGCCTCGGGTCAACCCAGGTGGG |
| D: FRN gnl SRA SR4292276.107733945.2 | CTGGAGGGAAGACGGGTTCCTGGGGAGGAGAACTCGGCTCCTGGAGGAATATCCAGCGCCTCGGGTCAACCCAGGTGGG |
| D: FRN gnl SRA SR4292276.42412481.1  | CTGGAGGGAAGACGGGTTCCTGGGGAGGAGAACTCGGCTCCTGGAGGAATATCCAGCGCCTCGGGTCAACCCAGGTGGG |
| D: FRN gnl SRA SR6923830.201831429.1 | CTGGAGGGAAGACGGGTTCCTGGGGAGGAGAACTCGGCTCCTGGAGGAATATCCAGCGCCTCGGGTCAACCCAGGTGGG |
| D: FRN gnl SRA SR6923830.158428037.1 | CTGGAGGGAAGACGGGTTCCTGGGGAGGAGAACTCGGCTCCTGGAGGAATATCCAGCGCCTCGGGTCAACCCAGGTGGG |
| D: FRN gnl SRA SR6923830.201829607.1 | CTGGAGGGAAGACGGGTTCCTGGGGAGGAGAACTCGGCTCCTGGAGGAATATCCAGCGCCTCGGGTCAACCCAGGTGGG |
| D: FRN gnl SRA SR4292276.104863282.1 | CTGGAGGGAAGACGGGTTCCTGGGGAGGAGAACTCGGCTCCTGGAGGAATATCCAGCGCCTCGGGTCAACCCAGGTGGG |
| D: FRN gnl SRA SR6923830.93401937.1  | CTGGAGGGAAGACGGGTTCCTGGGGAGGAGAACTCGGCTCCTGGAGGAATATCCAGCGCCTCGGGTCAACCCAGGTGGG |
| D: FRN gnl SRA SR6923830.180531754.1 | CTGGAGGGAAGACGGGTTCCTGGGGAGGAGAACTCGGCTCCTGGAGGAATATCCAGCGCCTCGGGTCAACCCAGGTGGG |
| D: FRN gnl SRA SR6923830.154657412.2 | CTGGAGGGAAGACGGGTTCCTGGGGAGGAGAACTCGGCTCCTGGAGGAATATCCAGCGCCTCGGGTCAACCCAGGTGGG |
| D: FRN gnl SRA SR6923830.154679079.2 | CTGGAGGGAAGACGGGTTCCTGGGGAGGAGAACTCGGCTCCTGGAGGAATATCCAGCGCCTCGGGTCAACCCAGGTGGG |
| D: FRN gnl SRA SR6923830.154679664.2 | CTGGAGGGAAGACGGGTTCCTGGGGAGGAGAACTCGGCTCCTGGAGGAATATCCAGCGCCTCGGGTCAACCCAGGTGGG |
| D: FRN gnl SRA SR6923830.8082014.2   | CTGGAGGGAAGACGGGTTCCTGGGGAGGAGAACTCGGCTCCTGGAGGAATATCCAGCGCCTCGGGTCAACCCAGGTGGG |
| D: FRN gnl SRA SR6923830.182577042.3 | CTGGAGGGAAGACGGGTTCCTGGGGAGGAGAACTCGGCTCCTGGAGGAATATCCAGCGCCTCGGGTCAACCCAGGTGGG |
| D: FRN gnl SRA SR6923830.338048237.1 | CTGGAGGGAAGACGGGTTCCTGGGGAGGAGAACTCGGCTCCTGGAGGAATATCCAGCGCCTCGGGTCAACCCAGGTGGG |
| D: FRN gnl SRA SR4292276.158711716.2 | CTGGAGGGAAGACGGGTTCCTGGGGAGGAGAACTCGGCTCCTGGAGGAATATCCAGCGCCTCGGGTCAACCCAGGTGGG |
| D: FRN gnl SRA SR4292276.17521294.2  | CTGGAGGGAAGACGGGTTCCTGGGGAGGAGAACTCGGCTCCTGGAGGAATATCCAGCGCCTCGGGTCAACCCAGGTGGG |
| D: FRN gnl SRA SR4292276.60895757.2  | CTGGAGGGAAGACGGGTTCCTGGGGAGGAGAACTCGGCTCCTGGAGGAATATCCAGCGCCTCGGGTCAACCCAGGTGGG |
| D: FRN gnl SRA SR4292276.8141219.1   | CTGGAGGGAAGACGGGTTCCTGGGGAGGAGAACTCGGCTCCTGGAGGAATATCCAGCGCCTCGGGTCAACCCAGGTGGG |
| D: FRN gnl SRA SR6923830.263401553.1 | CTGGAGGGAAGACGGGTTCCTGGGGAGGAGAACTCGGCTCCTGGAGGAATATCCAGCGCCTCGGGTCAACCCAGGTGGG |

**Balaenoptera acutorostrata**

SRA searched

**SRR924087** - Korea Institute of Ocean Science and Technology 2013-10-31 **Sample ID:** SAMN02192644 (MinkeWhale-01)

**SRR4011112** - Institute of Marine Research 2016-08-13 **Sample ID:** SAMN05447714 (AT)

| Accession                            | Sequence                                                                        |
|--------------------------------------|---------------------------------------------------------------------------------|
| D: BTANM_177493.2 EX1                | ATCCAGGAGGAGGGGCTACTCTCCTGAAGGAATACCCACAGCGCTTCATGGTCTCCAG                      |
| FRN NW_006725988.1:2215263-2778680   | CTGGAGGGAAGACGGGTTCCTGGGGAGGAGAACTCGGCTCCTGGAGGAATATCCAGCGCCTCGGGTCAACCCAGGTGGG |
| D: FRN gnl SRA SR924087.465756880.2  | CTGGAGGGAAGACGGGTTCCTGGGGAGGAGAACTCGGCTCCTGGAGGAATATCCAGCGCCTCGGGTCAACCCAGGTGGG |
| D: FRN gnl SRA SR4011112.144961281.1 | CTGGAGGGAAGACGGGTTCCTGGGGAGGAGAACTCGGCTCCTGGAGGAATATCCAGCGCCTCGGGTCAACCCAGGTGGG |
| D: FRN gnl SRA SR4011112.128790583.1 | CTGGAGGGAAGACGGGTTCCTGGGGAGGAGAACTCGGCTCCTGGAGGAATATCCAGCGCCTCGGGTCAACCCAGGTGGG |
| D: FRN gnl SRA SR4011112.108896449.2 | CTGGAGGGAAGACGGGTTCCTGGGGAGGAGAACTCGGCTCCTGGAGGAATATCCAGCGCCTCGGGTCAACCCAGGTGGG |
| D: FRN gnl SRA SR924087.498164126.2  | CTGGAGGGAAGACGGGTTCCTGGGGAGGAGAACTCGGCTCCTGGAGGAATATCCAGCGCCTCGGGTCAACCCAGGTGGG |
| D: FRN gnl SRA SR924087.51926380.2   | CTGGAGGGAAGACGGGTTCCTGGGGAGGAGAACTCGGCTCCTGGAGGAATATCCAGCGCCTCGGGTCAACCCAGGTGGG |
| D: FRN gnl SRA SR4011112.191489128.2 | CTGGAGGGAAGACGGGTTCCTGGGGAGGAGAACTCGGCTCCTGGAGGAATATCCAGCGCCTCGGGTCAACCCAGGTGGG |
| D: FRN gnl SRA SR924087.211208095.2  | CTGGAGGGAAGACGGGTTCCTGGGGAGGAGAACTCGGCTCCTGGAGGAATATCCAGCGCCTCGGGTCAACCCAGGTGGG |
| D: FRN gnl SRA SR924087.171879283.2  | CTGGAGGGAAGACGGGTTCCTGGGGAGGAGAACTCGGCTCCTGGAGGAATATCCAGCGCCTCGGGTCAACCCAGGTGGG |
| D: FRN gnl SRA SR924087.84702125.1   | CTGGAGGGAAGACGGGTTCCTGGGGAGGAGAACTCGGCTCCTGGAGGAATATCCAGCGCCTCGGGTCAACCCAGGTGGG |
| D: FRN gnl SRA SR924087.149291345.1  | CTGGAGGGAAGACGGGTTCCTGGGGAGGAGAACTCGGCTCCTGGAGGAATATCCAGCGCCTCGGGTCAACCCAGGTGGG |
| D: FRN gnl SRA SR924087.433409941.1  | CTGGAGGGAAGACGGGTTCCTGGGGAGGAGAACTCGGCTCCTGGAGGAATATCCAGCGCCTCGGGTCAACCCAGGTGGG |
| D: FRN gnl SRA SR924087.198292309.2  | CTGGAGGGAAGACGGGTTCCTGGGGAGGAGAACTCGGCTCCTGGAGGAATATCCAGCGCCTCGGGTCAACCCAGGTGGG |
| D: FRN gnl SRA SR924087.206813918.2  | CTGGAGGGAAGACGGGTTCCTGGGGAGGAGAACTCGGCTCCTGGAGGAATATCCAGCGCCTCGGGTCAACCCAGGTGGG |
| D: FRN gnl SRA SR4011112.73202599.2  | CTGGAGGGAAGACGGGTTCCTGGGGAGGAGAACTCGGCTCCTGGAGGAATATCCAGCGCCTCGGGTCAACCCAGGTGGG |
| D: FRN gnl SRA SR924087.33416283.2   | CTGGAGGGAAGACGGGTTCCTGGGGAGGAGAACTCGGCTCCTGGAGGAATATCCAGCGCCTCGGGTCAACCCAGGTGGG |
| D: FRN gnl SRA SR924087.209635720.2  | CTGGAGGGAAGACGGGTTCCTGGGGAGGAGAACTCGGCTCCTGGAGGAATATCCAGCGCCTCGGGTCAACCCAGGTGGG |
| D: FRN gnl SRA SR924087.40277658.1   | CTGGAGGGAAGACGGGTTCCTGGGGAGGAGAACTCGGCTCCTGGAGGAATATCCAGCGCCTCGGGTCAACCCAGGTGGG |
| D: FRN gnl SRA SR924087.289195282.2  | CTGGAGGGAAGACGGGTTCCTGGGGAGGAGAACTCGGCTCCTGGAGGAATATCCAGCGCCTCGGGTCAACCCAGGTGGG |

***Eschrichtius robustus***

SRA searched

SRR5495100 - Purdue University 2017-05-02 Sample ID: SAMN06837694 (GFD-02 -female)

SRR5495106 - Purdue University 2017-05-02 Sample ID: SAMN06837692 (ER-14-168 -male)

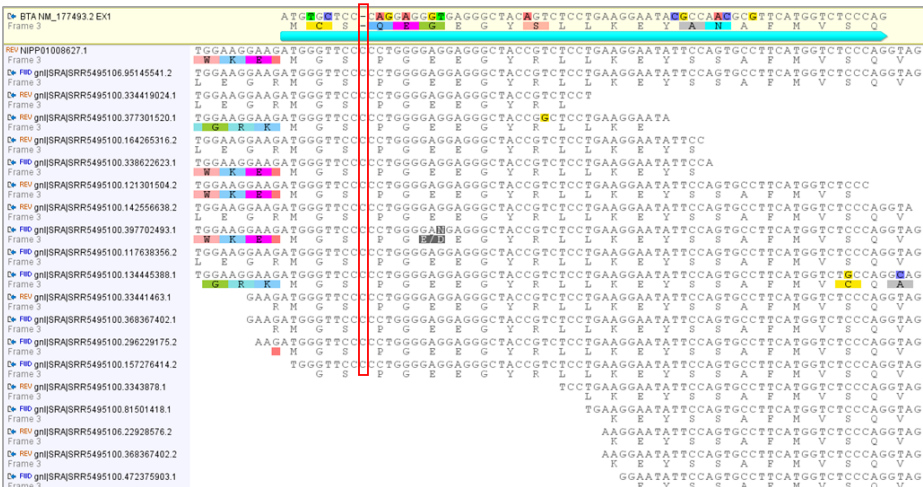

**Figure S7:** SRA validation for conserved frameshift mutation (red box) in exon 1 of the *Asmt* gene from *O. orca*, *T. truncatus*, *D. leucas*, *N. asiaeorientalis*, *B. acutorostrata* and *E. robustus*.

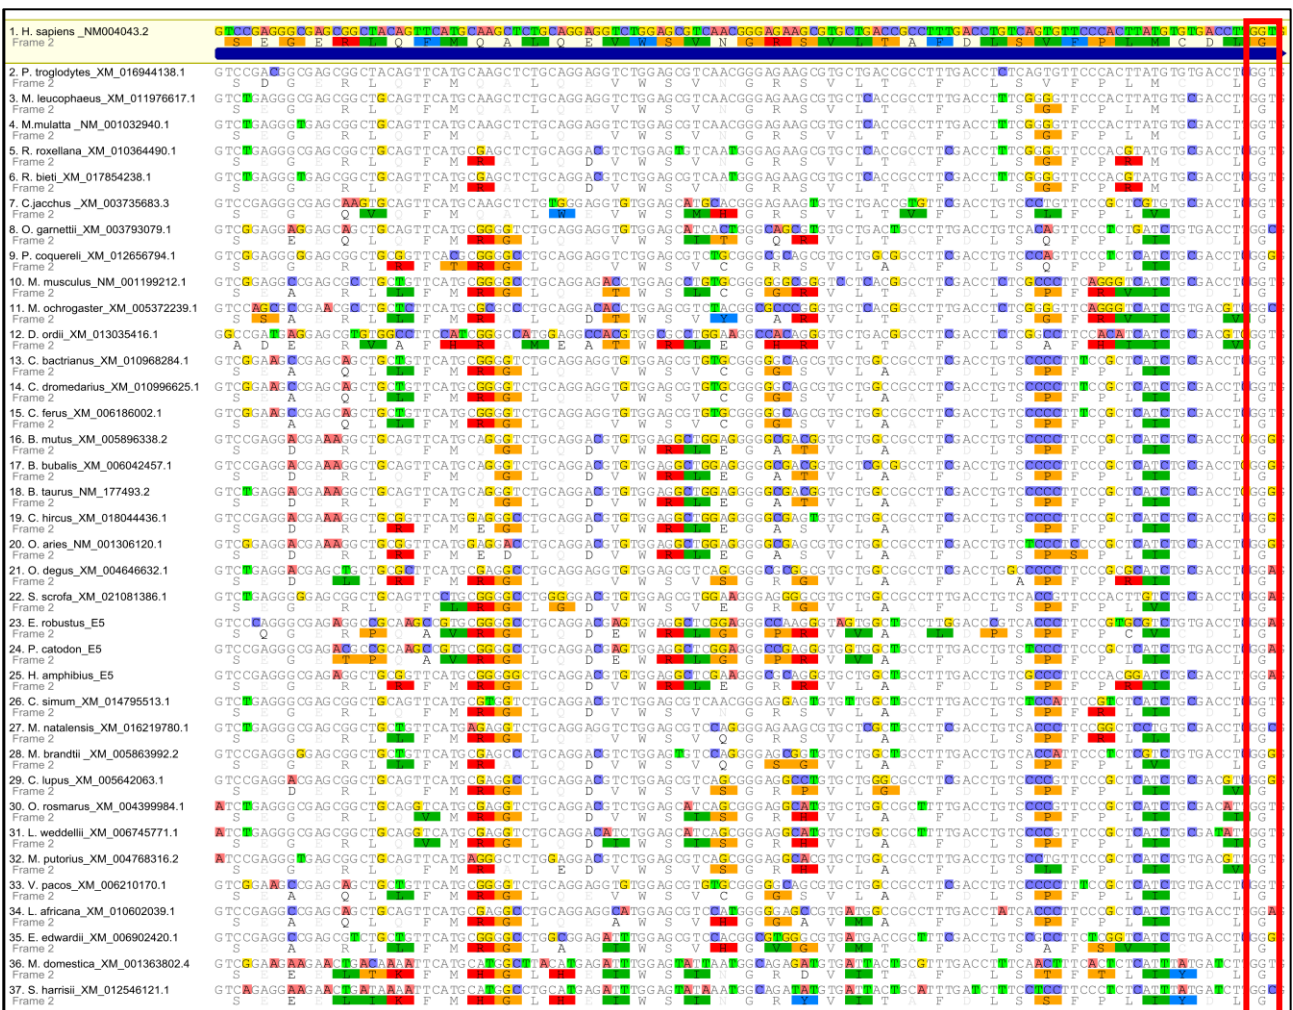

**Figure S8:** Alignment of exon 5 of *Asmt* in multiple mammals, red box indicates conserved Gly187 participating in the active site of ASMT.

**Physeter catodon** frameshift mutation 1 nt insertion in exon 4

SRA searched

**SRR5146843**- The Genome Center at Washington University School of Medicine in St. Louis 2017-01-05 **Sample ID:** SAMN06187413

**SRR5146847**- The Genome Center at Washington University School of Medicine in St. Louis 2017-01-05 **Sample ID:** SAMN06187412

**SRR5146865**- The Genome Center at Washington University School of Medicine in St. Louis 2017-01-05 **Sample ID:** SAMN06187411

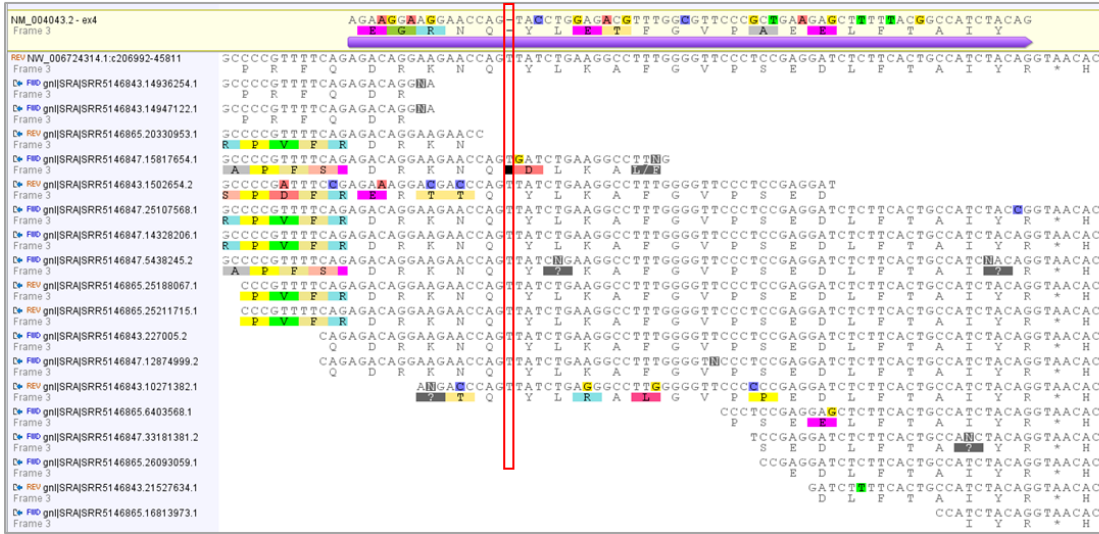

**Figure S9:** SRA validation for frameshift mutation (red box) in exon 4 of *P. catodon* Asmt.

**Lagenorhynchus obliquidens**

129

SRA searched

**SRR7349574** - BC Cancer Agency Michael Smith Genome Sciences Centre (BCCAGSC) 2018-06-21 **Sample ID:** SAMN09386610

**SRR7345555** - BC Cancer Agency Michael Smith Genome Sciences Centre (BCCAGSC) 2018-06-21 **Sample ID:** SAMN09386610

130

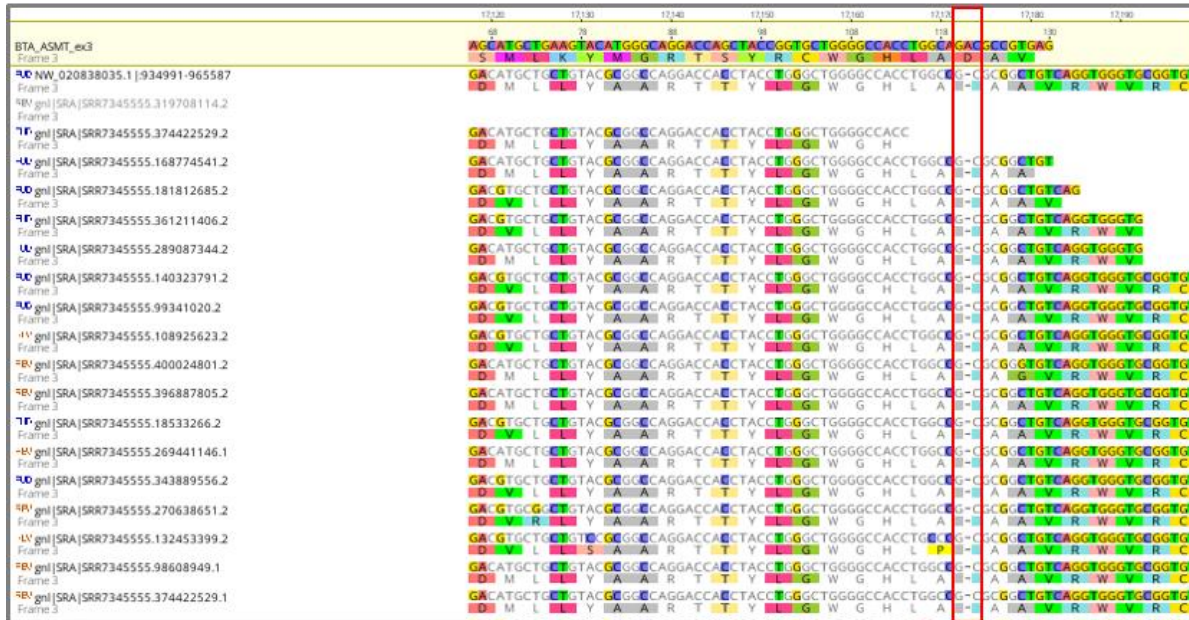

**Figure S10:** SRA validation for frameshift mutation (red box) in exon 3 of *L. obliquidens* Asmt.



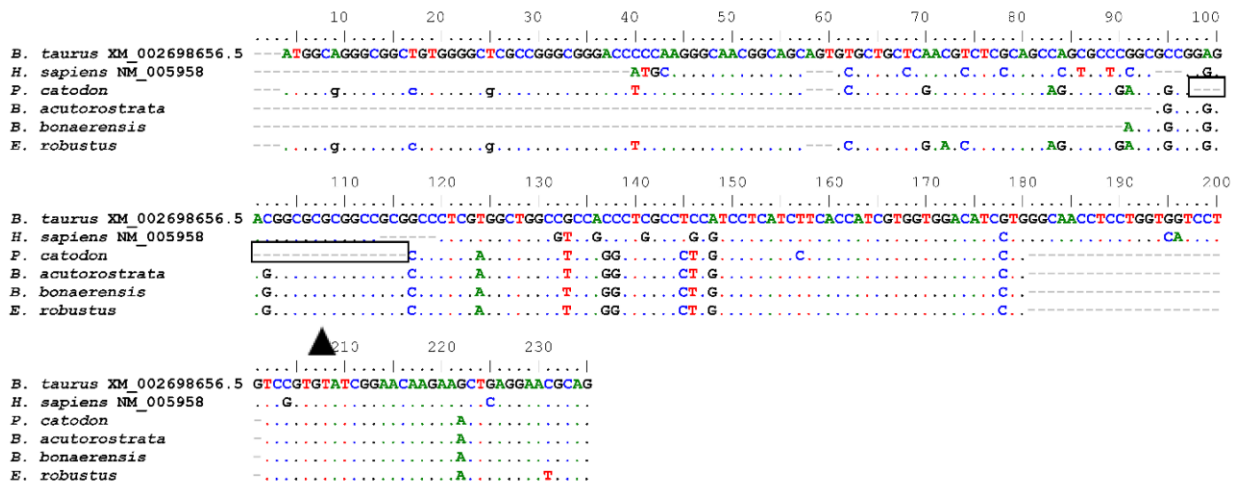

**Figure S11:** Multiple alignment of the predicted *Mtnr1a* relic sequences (exon 1) in the listed species. Nucleotide insertion of *P. catodon*, validated with SRA, is represented in the corresponding position with a black arrow

***Physeter catodon* frameshift mutation 19 nt deletion in exon 1**

SRA searched

**SRR5146843-** The Genome Center at Washington University School of Medicine in St. Louis 2017-01-05 **Sample ID:** SAMN06187413

**SRR5146847-** The Genome Center at Washington University School of Medicine in St. Louis 2017-01-05 **Sample ID:** SAMN06187412

**SRR5146865-** The Genome Center at Washington University School of Medicine in St. Louis 2017-01-05 **Sample ID:** SAMN06187411

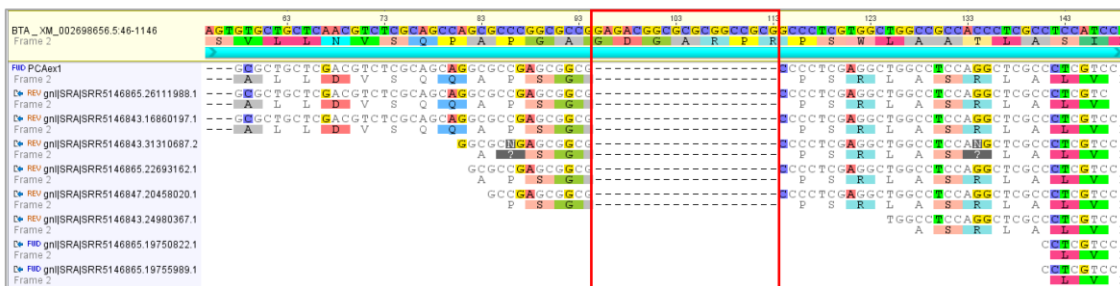

**Figure S12:** SRA validation for 19 nucleotide deletion in exon 1 of *P. catodon* *Mtnr1a*.

**MTNR1B**

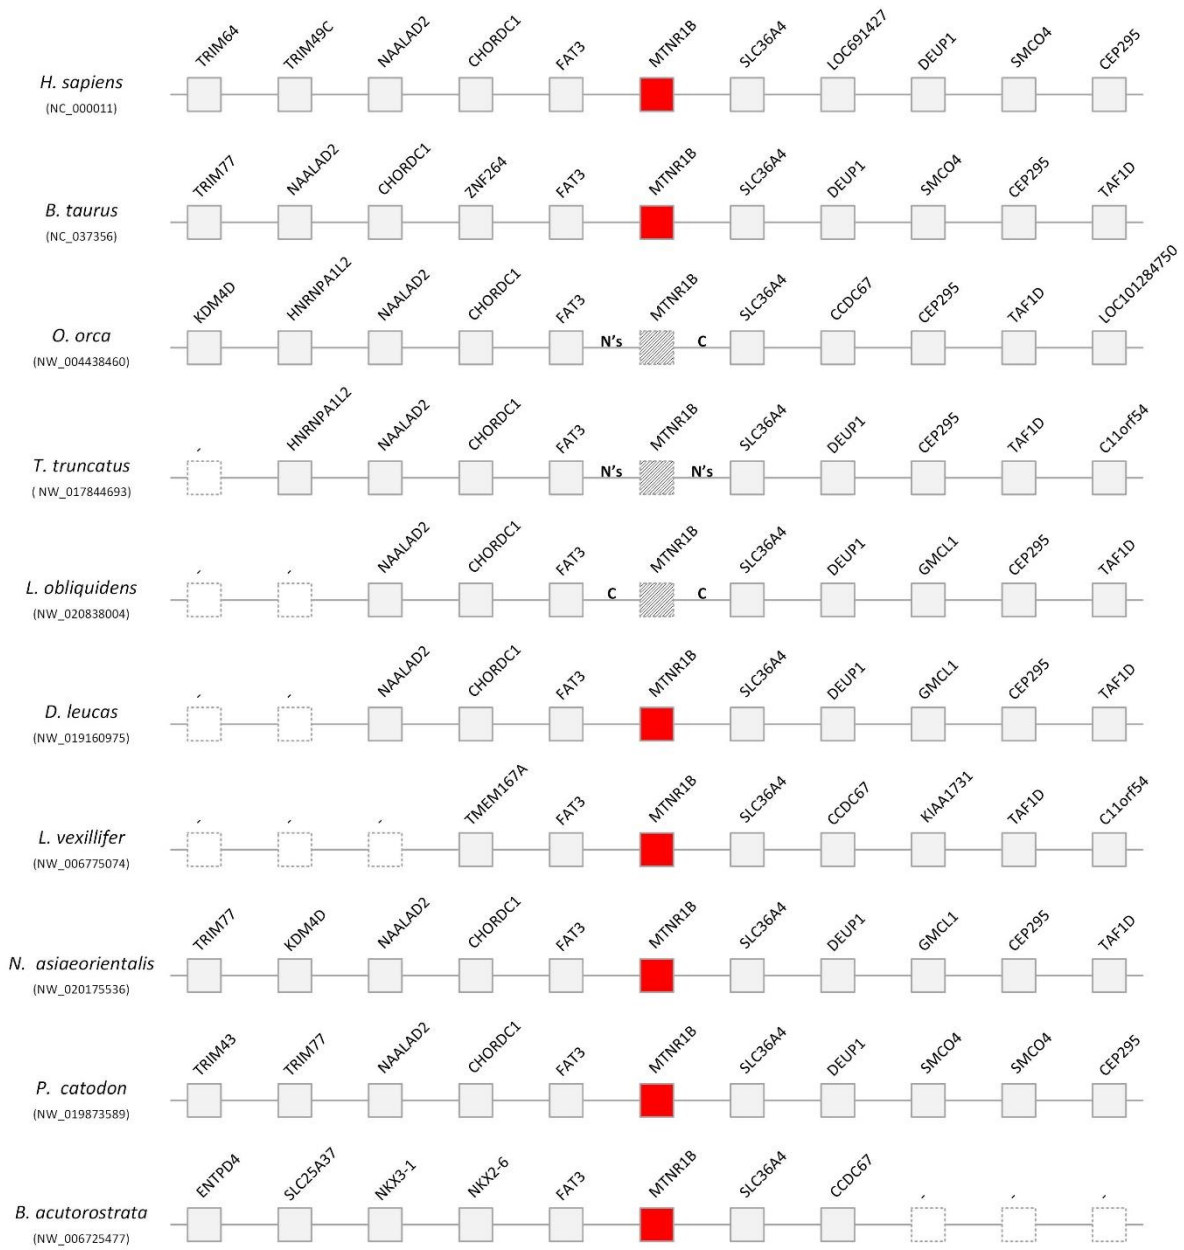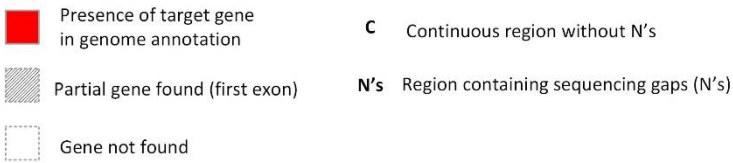

**Figure S13:** Comparative synteny maps of *Mtnr1b* genomic locus.

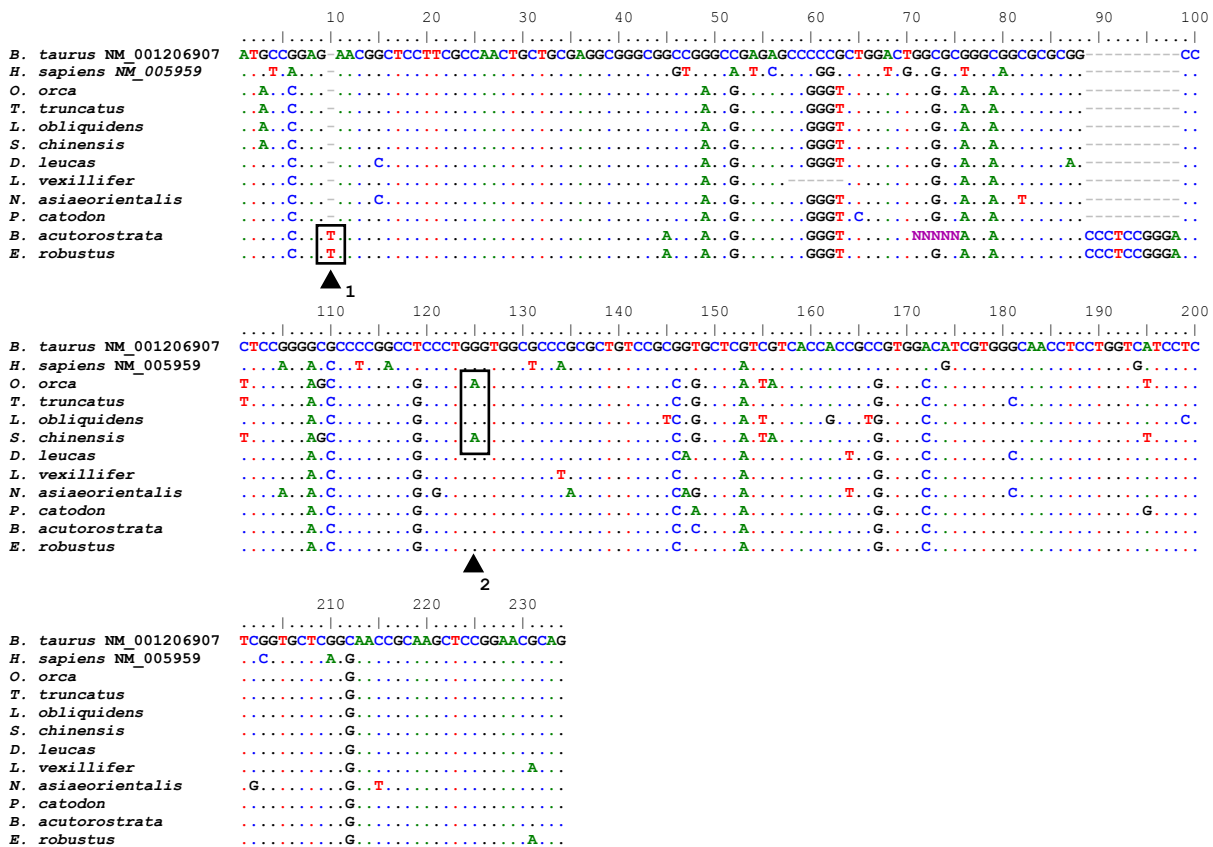

**Figure S14:** Multiple alignment of the predicted exon 1 of *Mtnr1b* in the listed species. Nucleotide insertion, generating a premature stop codon, in *B. acutorostrata* and *E. robustus* and premature stop codon retrieved in *O. orca* and *S. chinensis*, mutations validated with SRA (when available), are represented in the corresponding position with a black arrow.

**Orcinus orca** Stop codon exon 1

SRA searched

**SRR1164379** - University of Durham 2014-02-13 Sample ID: SAMN02595096 (AR-Genome)

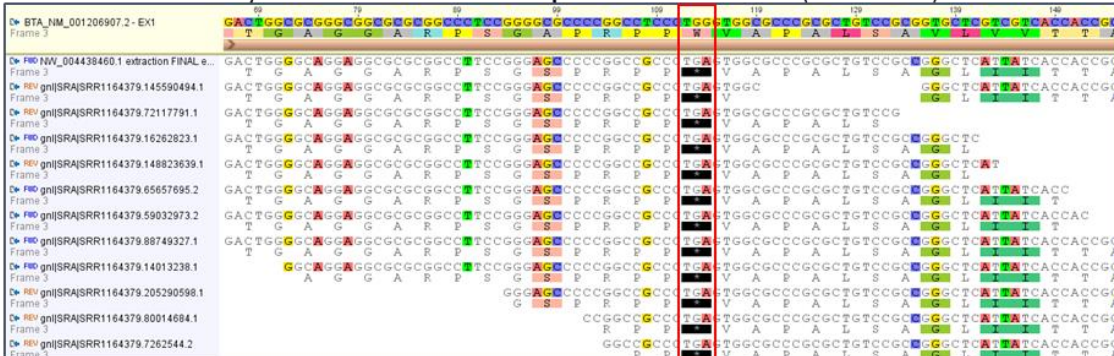

**Figure S15:** SRA validation for stop mutation (red box) in exon 1 of the *Mtnr1b* gene from *O. orca*.

**Balaenoptera acutorostrata** Exon 1 1bp insertion creates premature stop codon

SRA searched

**SRR924087**- Korea Institute of Ocean Science and Technology 2013-10-31 **Sample ID:** SAMN02192644 (MinkeWhale-01)

**SRR4011112**- Institute of Marine Research 2016-08-13 **Sample ID:** SAMN05447714 (AT)

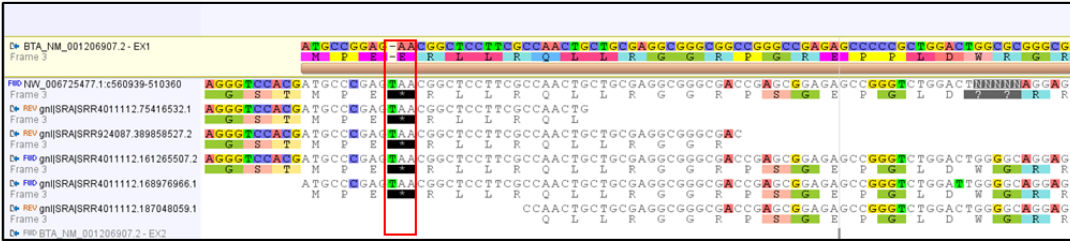

**Eschrichtius robustus** Exon 1 1bp insertion creates premature stop codon

SRA searched

**SRR5495100**- Purdue University 2017-05-02 **Sample ID:** SAMN06837694 (GFD-02)

**SRR5495106**- Purdue University 2017-05-02 **Sample ID:** SAMN06837692 (ER-14-168)

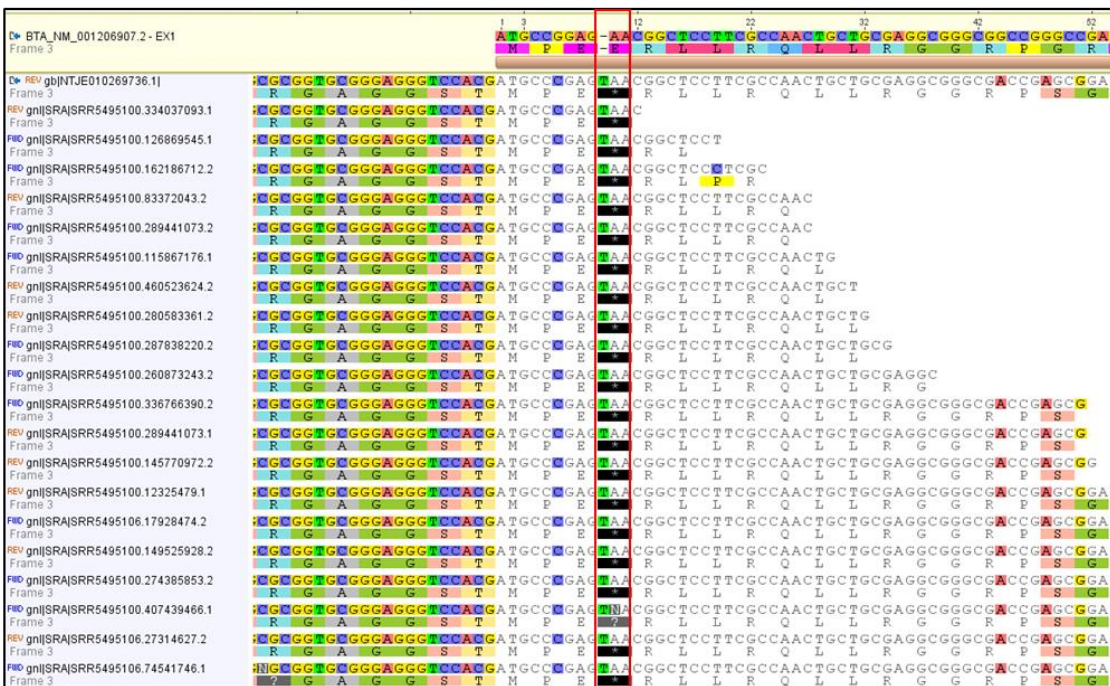

**Figure S16:** SRA validation for nucleotide insertion generating a premature stop mutation (red box) in exon 1 of the *Mntr1b* gene from *B. acutorostrata* and *E. robustus*.

**Lagenorhynchus obliquidens** Loss of start codon in exon 1 of *Mtnr1B*.

SRA searched

RRR7349574 - BC Cancer Agency Michael Smith Genome Sciences Centre (BCCAGSC) 2018-06-21 Sample ID: SAMN09386610

RRR7345555 - BC Cancer Agency Michael Smith Genome Sciences Centre (BCCAGSC) 2018-06-21 Sample ID: SAMN09386610

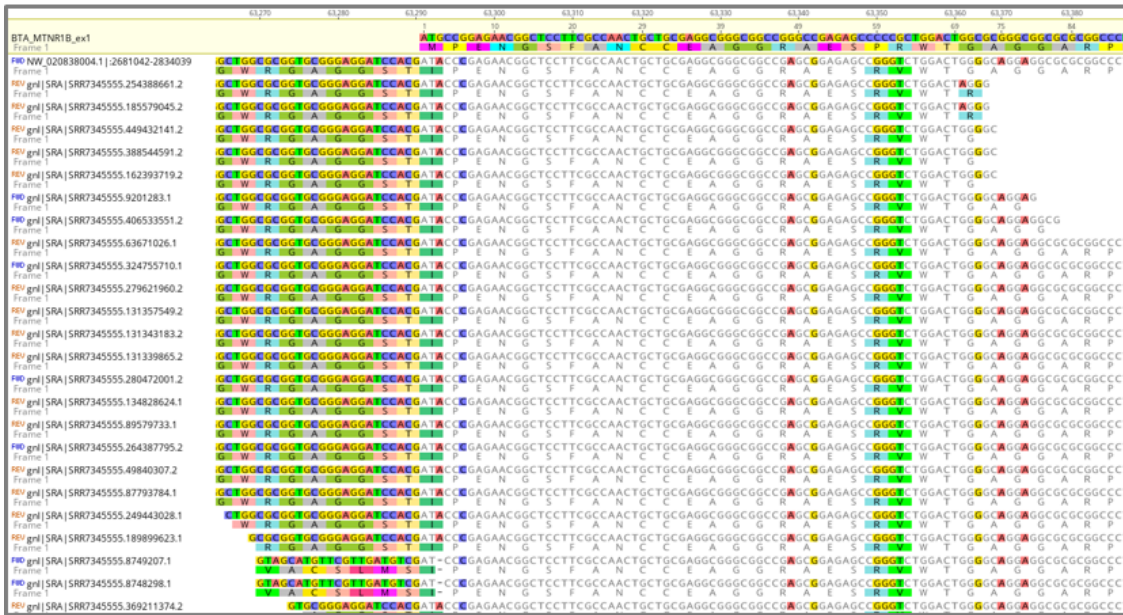

**Figure S17:** SRA validation for loss of start codon in exon 1 of the *Mtnr1b* gene from *L. obliquidens*.

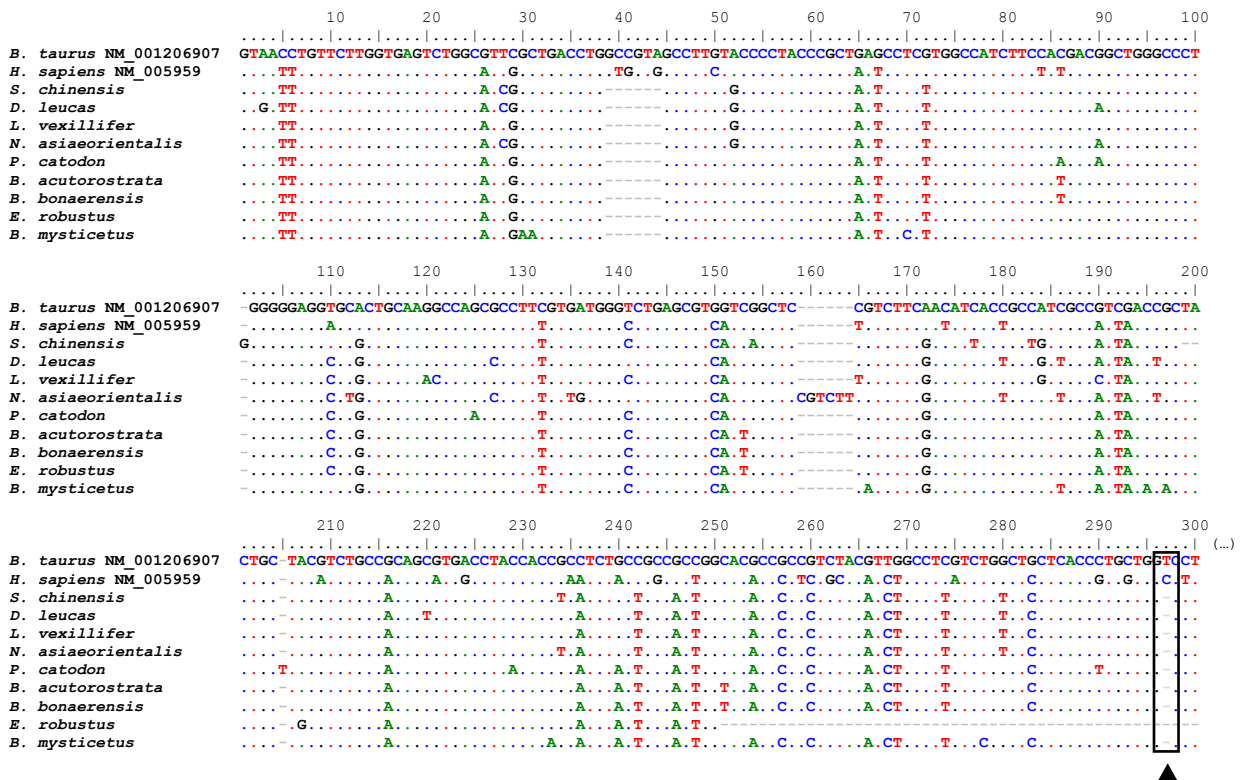

**Figure S18:** Partial multiple alignment of the predicted exon 2 of *Mtnr1b* in the listed species. Conserved nucleotide deletion, validated with SRA (when available), is represented in the corresponding position with a black arrow.

***Delphinapterus leucas*** conserved 1 nt deletion exon 2

SRA searched

**SRR5197962** - BC Cancer Agency Michael Smith Genome Sciences Centre 2017-06-27 Sample ID: SAMN06217832 (Qila21)

**SRR5659909** - BC Cancer Agency Michael Smith Genome Sciences Centre 2017-06-27 Sample ID: SAMN06216270 (Aurora29)

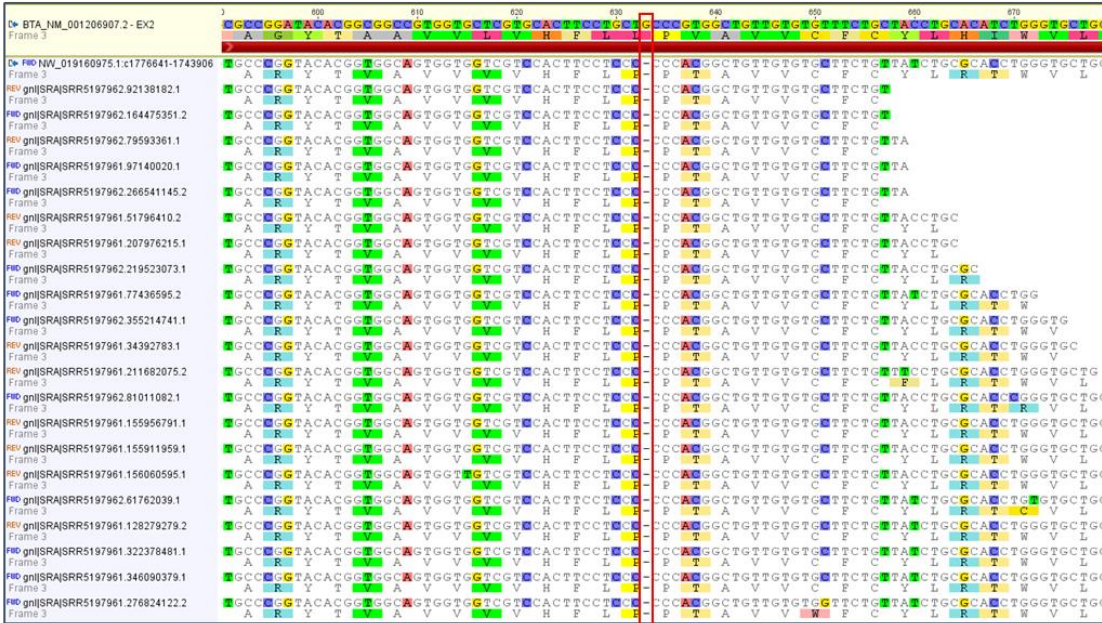

***Neophocaena asiaeorientalis*** conserved 1 nt deletion exon 2

SRA searched

**SRR6923630** - Northwestern Polytechnical University 2018-04-08 Sample ID: SAMN08512128

**SRR4292276** - Beijing Genome Institute 2017-09-23 Sample ID: SAMN05818630

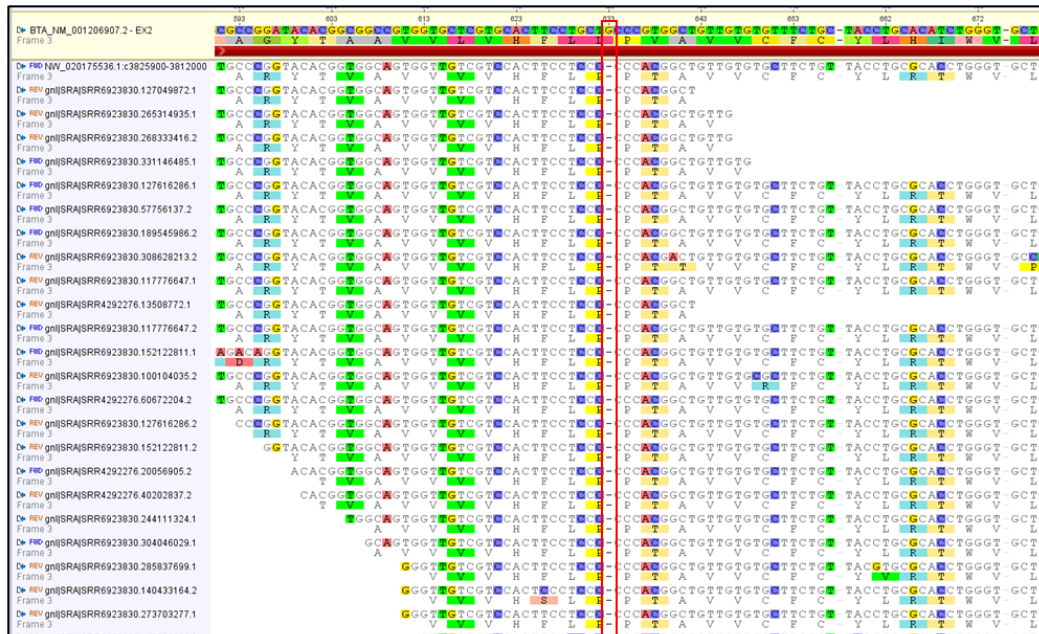

**Physeter catodon** 1 nt deletion and stop codon exon 2

SRA searched

**SRR5146843**- The Genome Center at Washington University School of Medicine in St. Louis 2017-01-05 **Sample ID:** SAMN06187413

**SRR5146865**- The Genome Center at Washington University School of Medicine in St. Louis 2017-01-05 **Sample ID:** SAMN06187411

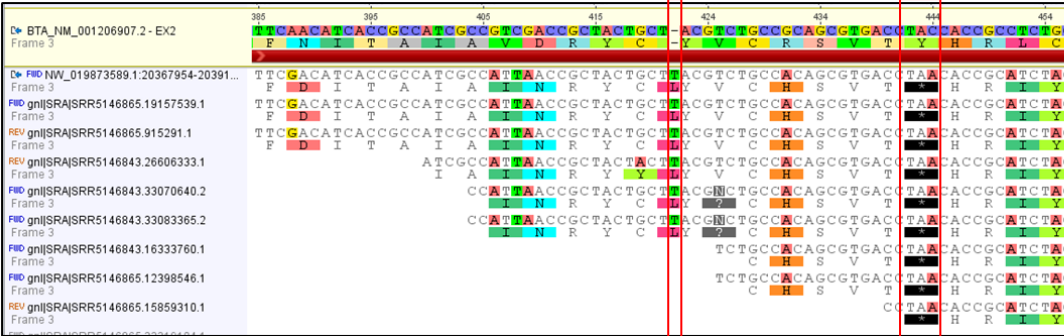

**Physeter catodon** conserved 1 nt deletion exon 2

SRA searched

**SRR5146847**- The Genome Center at Washington University School of Medicine in St. Louis 2017-01-05 **Sample ID:** SAMN06187412

**SRR5146843**- The Genome Center at Washington University School of Medicine in St. Louis 2017-01-05 **Sample ID:** SAMN06187413

**SRR5146865**- The Genome Center at Washington University School of Medicine in St. Louis 2017-01-05 **Sample ID:** SAMN06187411

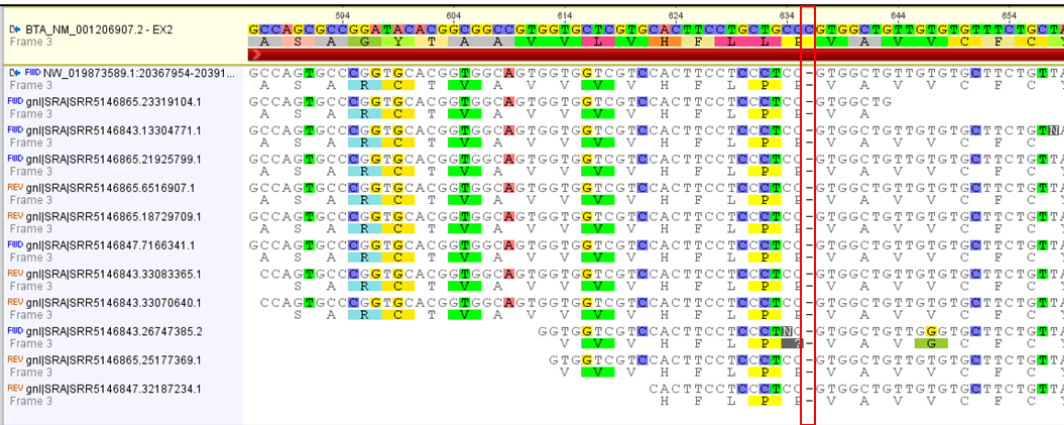

**Balaenoptera acutorostrata** Conserved 1 nt deletion exon 2

SRA searched

**SRR924087**- Korea Institute of Ocean Science and Technology 2013-10-31 **Sample ID:** SAMN02192644 (MinkeWhale-01)

**SRR4011112**- Institute of Marine Research 2016-08-13 **Sample ID:** SAMN05447714 (AT)

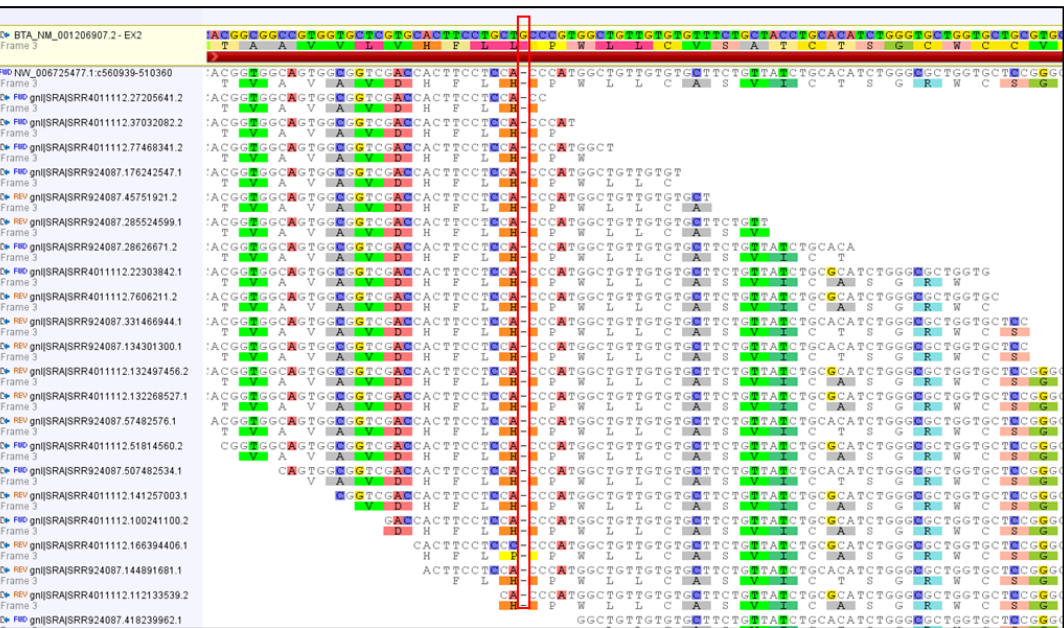

**Balaenoptera bonaerensis** Conserved 1 nt deletion exon 2

SRA searched

**SRR4011114**- Institute of Marine Research 2016-08-13 Sample ID: SAMN05447715

**SRR4011113**- Institute of Marine Research 2016-08-13 Sample ID: SAMN05447715

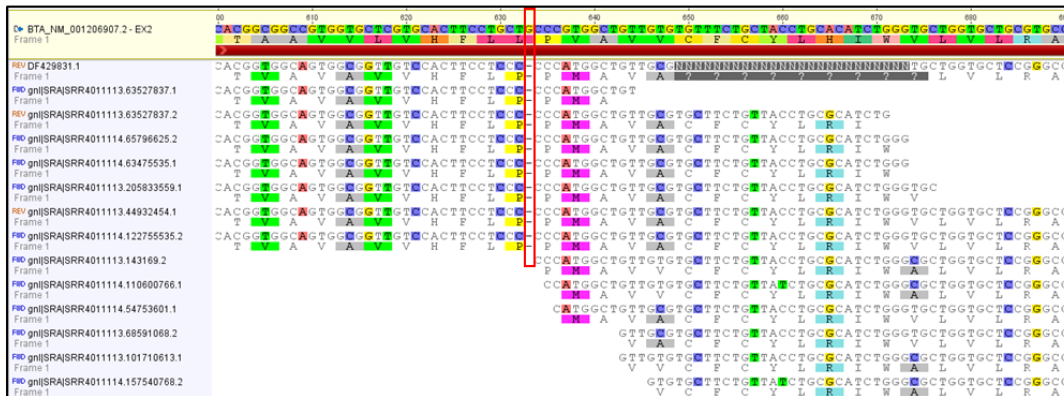

**Balaena mysticetus** Conserved 1 nt deletion exon 2

SRA searched

**SRR1685385**- University of Liverpool 2015-01-06 Sample ID: SAMN03225705 (Bowhead ID325)

**SRR1685386**- University of Liverpool 2015-01-06 Sample ID: SAMN03225705 (Bowhead ID325)

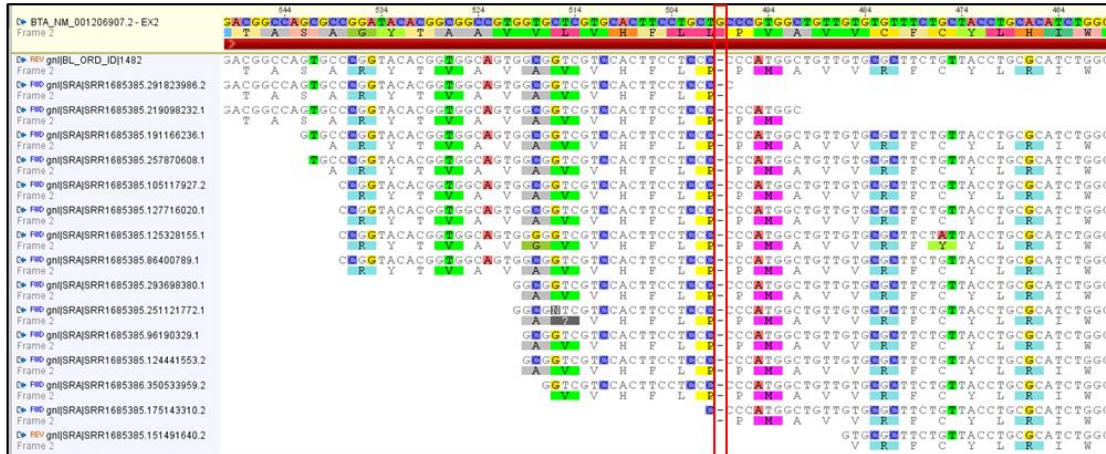

**Figure S19:** SRA validation for conserved nucleotide deletion in exon 2 of *Mtnr1b* from *D. leucas*, *N. asiaeorientalis*, *P. catodon*, *B. acutorostrata*, *B. bonaerensis* and *B. mysticetus*.



*Eschrichtius robustus* SRA reads bridging Exon 2 282bp deletion (NNN)

SRA searched

SRR5495100- Purdue University 2017-05-02 Sample ID: SAMN06837694 (GFD-02)

SRR5495106- Purdue University 2017-05-02 Sample ID: SAMN06837692 (ER-14-168)

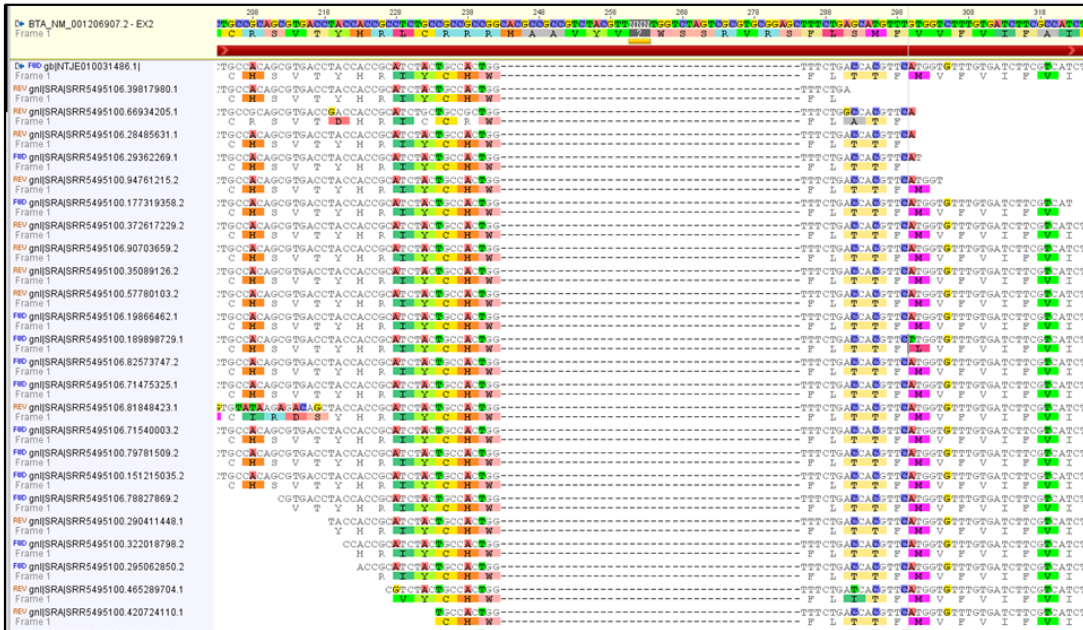

Figure S20: SRA validation for nucleotide deletion in exon 2 of *Mtnr1b* from *E. robustus*.

**Hippopotamus amphibius Asmt Exon 1 assembly using SRA**

SRA searched

WGS

SRR5663648 - Senckenberg Gesellschaft fuer Naturforschung Released: 2018-04-05 Sample: SAMN07206988

SRR5663647 - Senckenberg Gesellschaft fuer Naturforschung Released: 2018-04-05 Sample: SAMN07206988

RNA-seq

SRX1164570-SRR2183469 School of Biological & Chemical Sciences, Queen Mary University of London Released: 2015-09-30 Sample: SAMN0409372

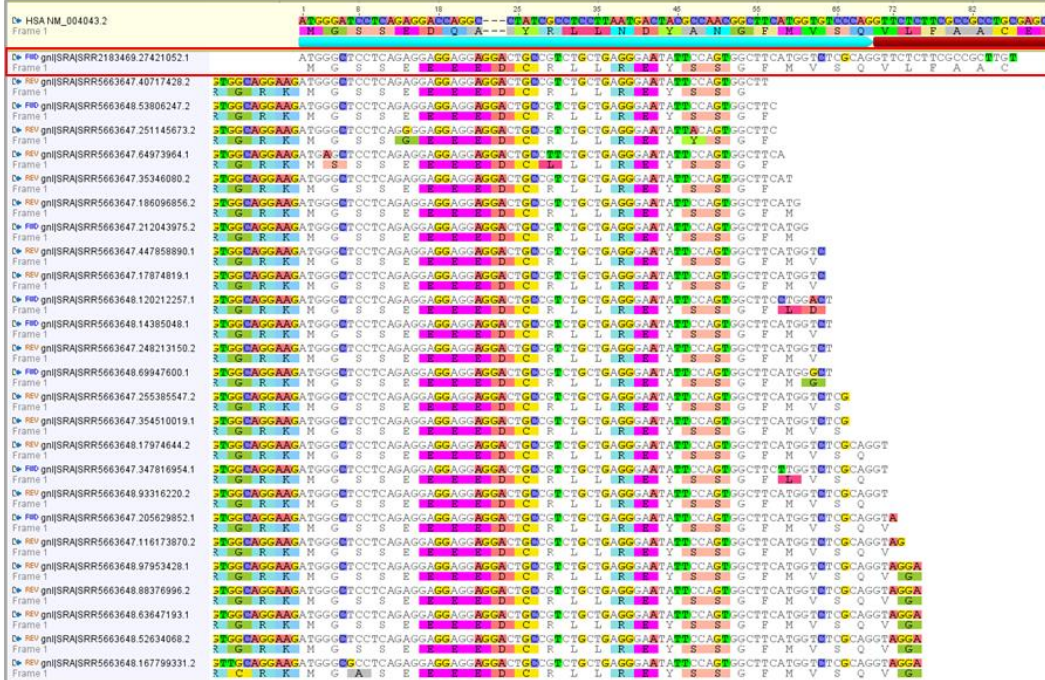

Red box highlights a spliced RNA-Seq read spanning from exon 1 to exon 2

**Hippopotamus amphibius Asmt Exon 5 assembly using SRA**

SRA searched

WGS

SRR5663648 - Senckenberg Gesellschaft fuer Naturforschung Released: 2018-04-05 Sample: SAMN07206988

SRR5663647 - Senckenberg Gesellschaft fuer Naturforschung Released: 2018-04-05 Sample: SAMN07206988

SRR5663646 - Senckenberg Gesellschaft fuer Naturforschung Released: 2018-04-05 Sample: SAMN07206988

RNA-seq

SRX1164570-SRR2183469 School of Biological & Chemical Sciences, Queen Mary University of London Released: 2015-09-30 Sample: SAMN0409372

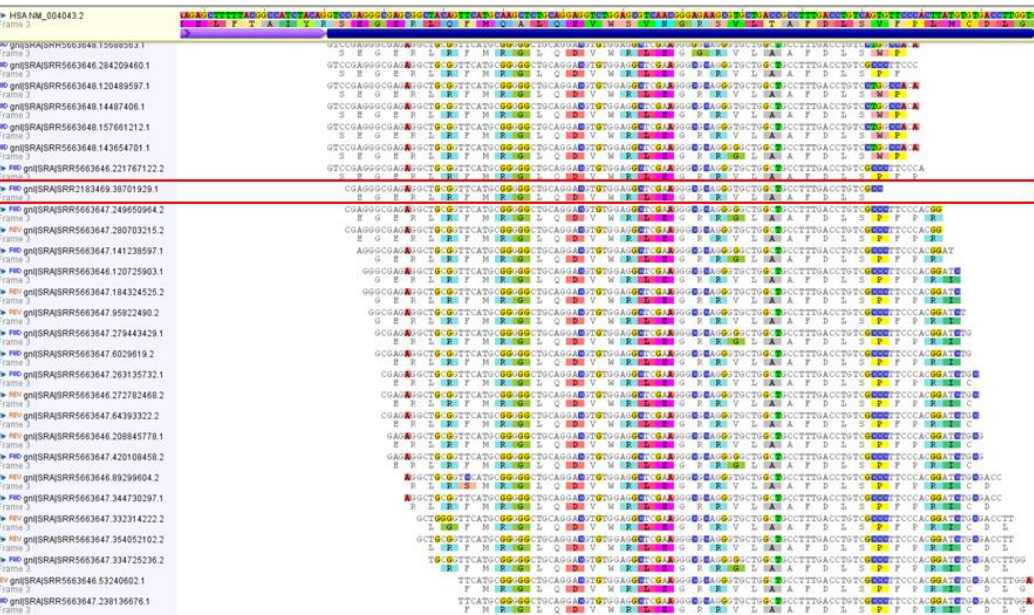

Red box highlights RNA-Seq read mapping to exon 5

**Figure S21:** *H. amphibius* Asmt exon 1 and 5 assembly.

0.01

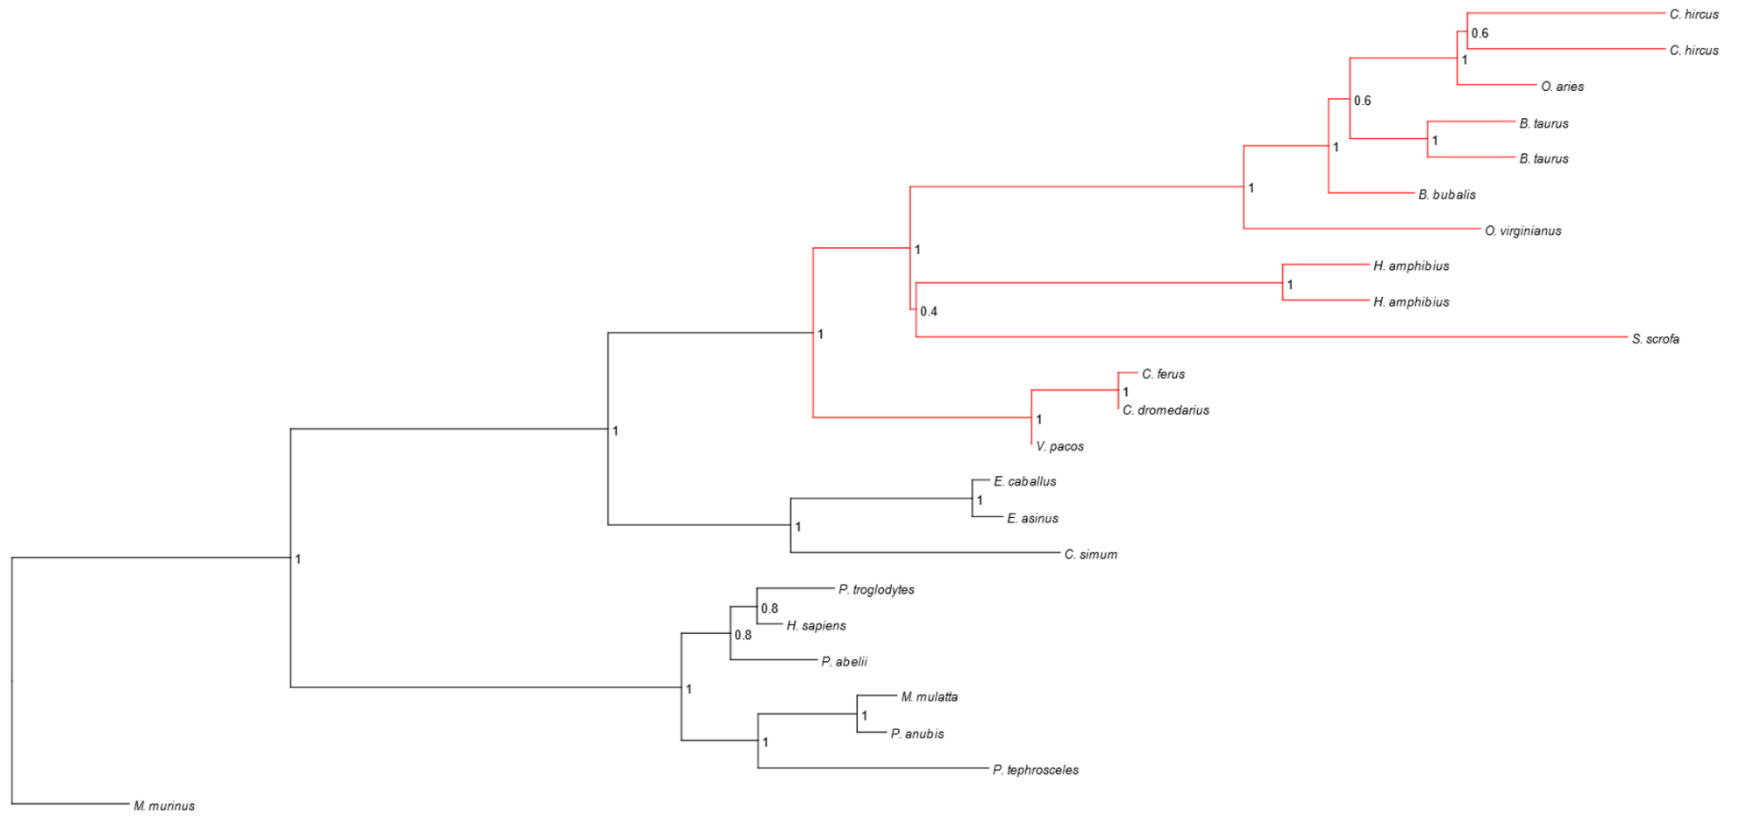

**Figure S22:** Maximum likelihood phylogenetic analysis of Perissodactyla, Artiodactyla and Primate *Anat* genes. Node values represent branch support using the aBayes algorithm. In red the clade containing the *H. amphibius*.

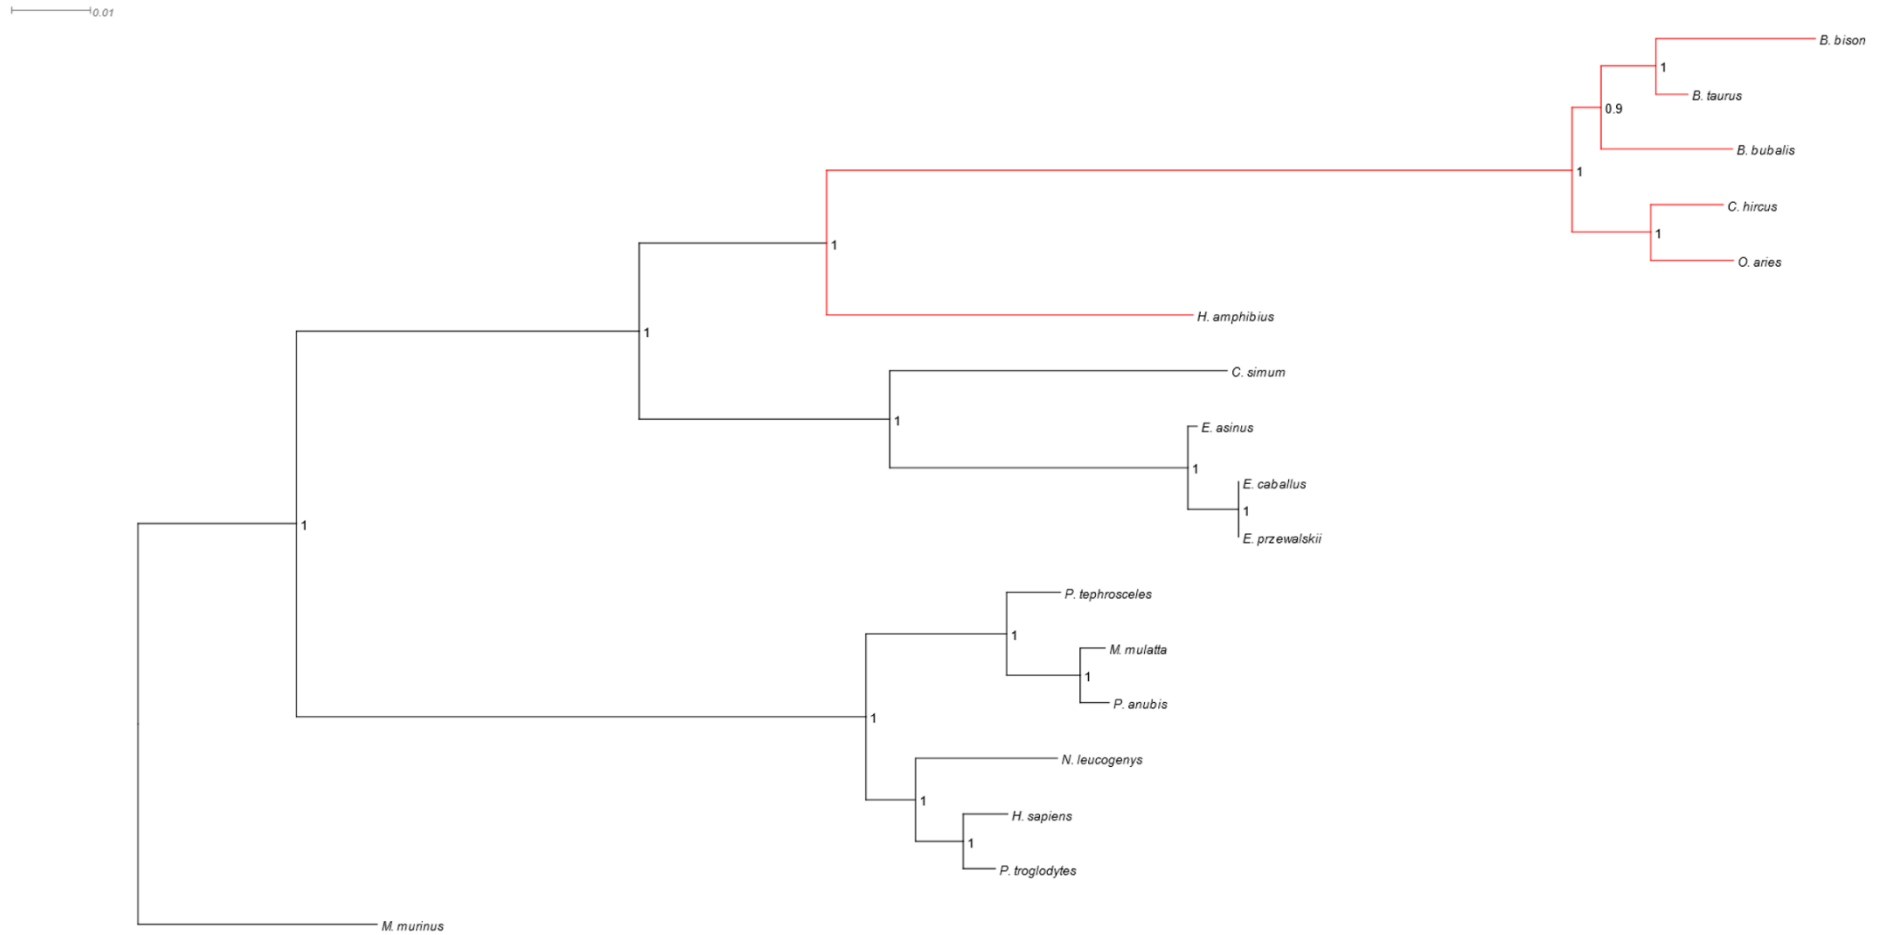

**Figure S23:** Maximum likelihood phylogenetic analysis of Perissodactyla, Artiodactyla and Primate *Mtnr1a* genes. Node values represent branch support using the aBayes algorithm. In red the clade containing the *H. amphibius*.

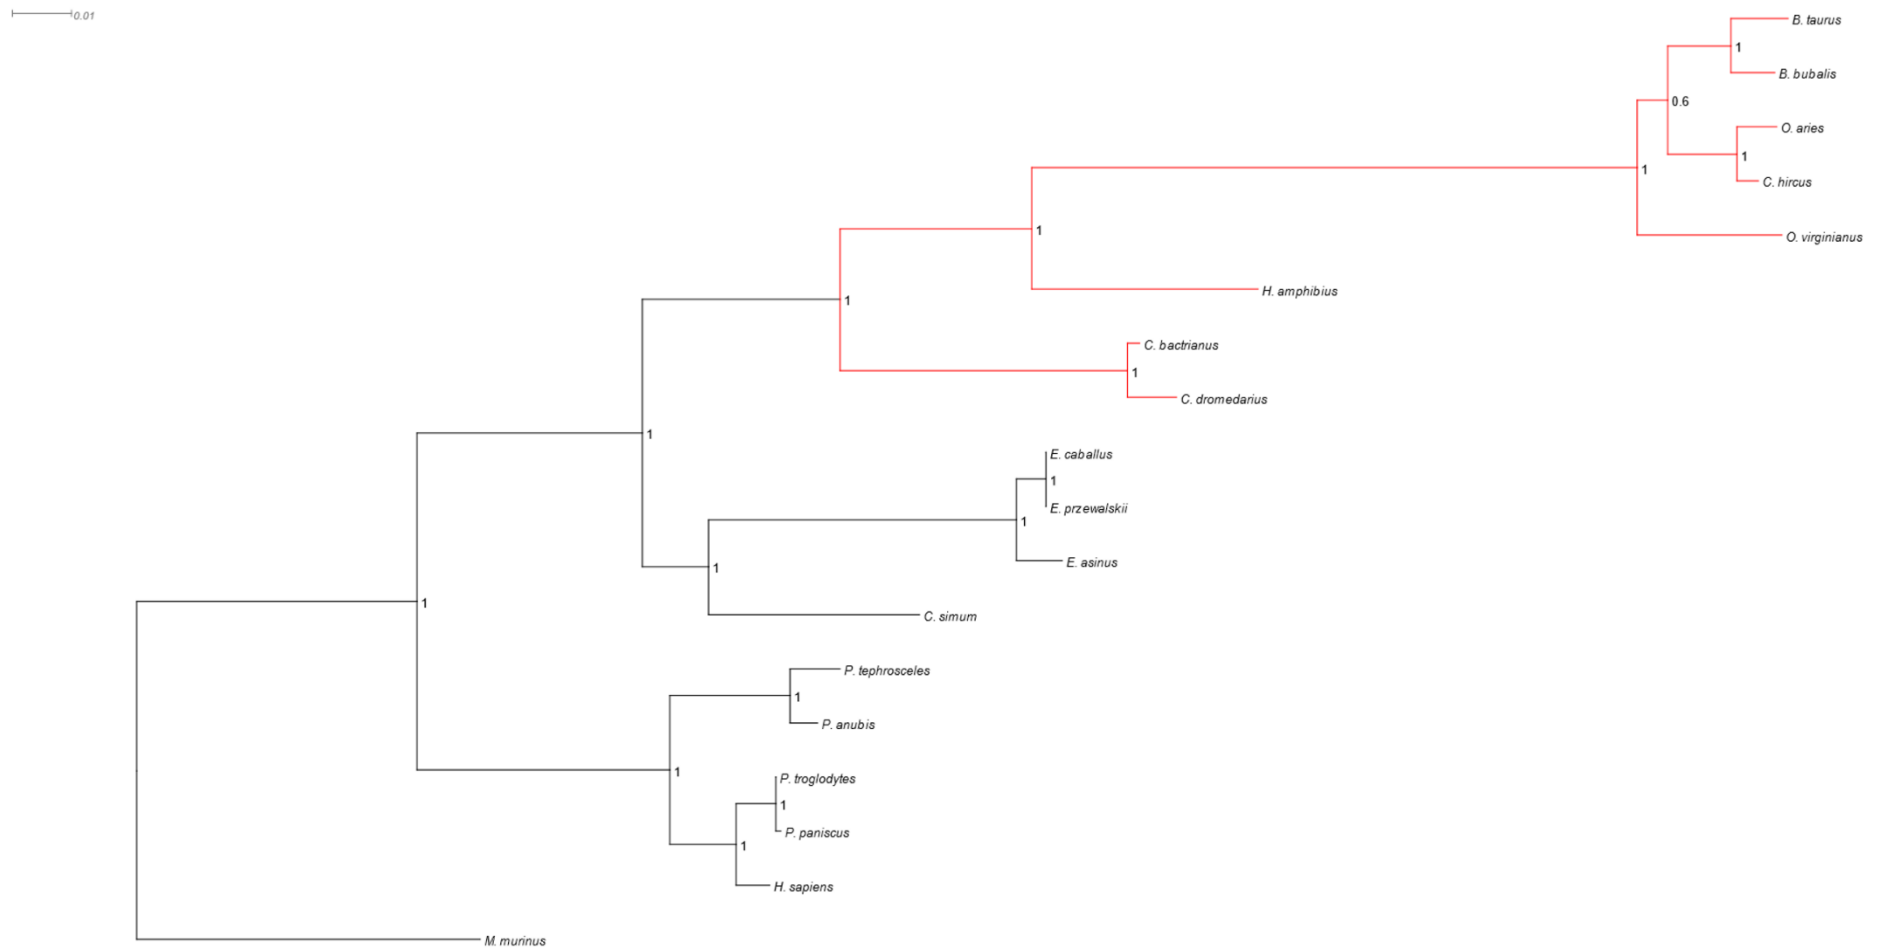

**Figure S24:** Maximum likelihood phylogenetic analysis of Perissodactyla, Artiodactyla and Primate *Mtnr1b* genes. Node values represent branch support using the aBayes algorithm. In red the clade containing the *H. amphibius*.

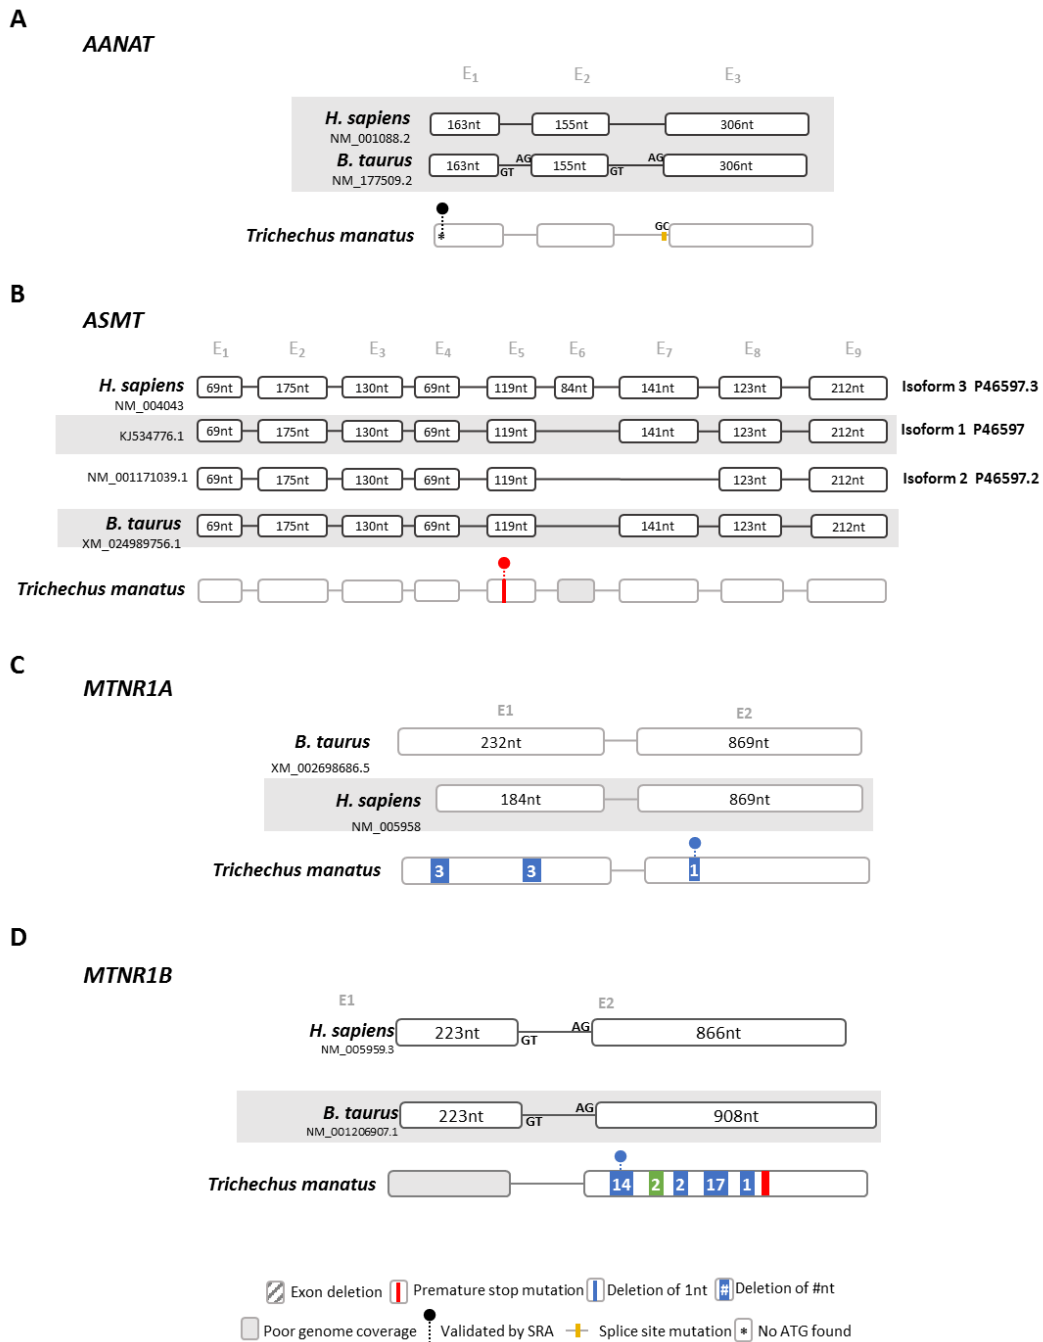

**Figure S25:** *T. manatus latirostris* gene annotations. Schematic representation of the gene structure of human and *B. taurus* *Aanat* (A), *Asmt* (B), *Mtnr1a* (C) and *Mtnr1b* (D) genes, each box represents an exon and lines represent intronic region, and schematic representation of the corresponding genes identified in *T. manatus latirostris* and location of the identified mutations. Non canonical splice sites are indicated above the corresponding annotation.

**Trichechus manatus latirostris**

SRA searched:

SRR331137 - Broad Institute (BI) 2011-08-17 Sample ID: SAMN00632092

SRR331138 - Broad Institute (BI) 2011-08-17 Sample ID: SAMN00632092

SRR331139 - Broad Institute (BI) 2011-08-17 Sample ID: SAMN00632092

SRR331142 - Broad Institute (BI) 2011-08-17 Sample ID: SAMN00632092

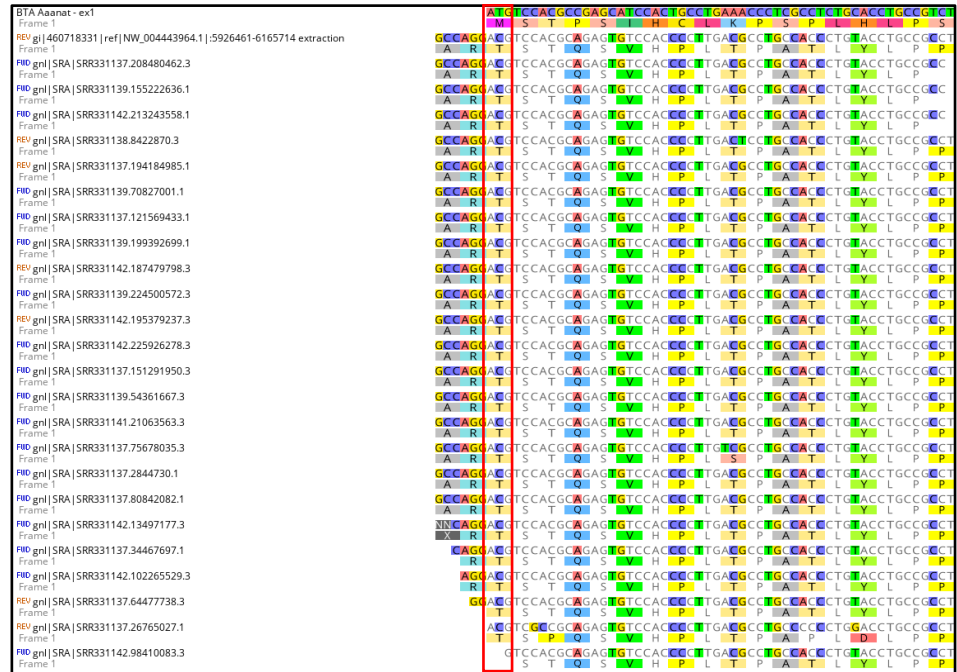

**Figure S26:** SRA validation for loss of start codon in exon 1 of the *Aanat* gene from *T. manatus latirostris*.

**Trichechus manatus latirostris**

SRA searched:

SRR331143 - Broad Institute (BI) 2011-08-17 Sample ID: SAMN00632092

SRR331145 - Broad Institute (BI) 2011-08-17 Sample ID: SAMN00632092

SRR353370 - Broad Institute (BI) 2011-10-16 Sample ID: SAMN00632092

SRR353371 - Broad Institute (BI) 2011-10-16 Sample ID: SAMN00632092

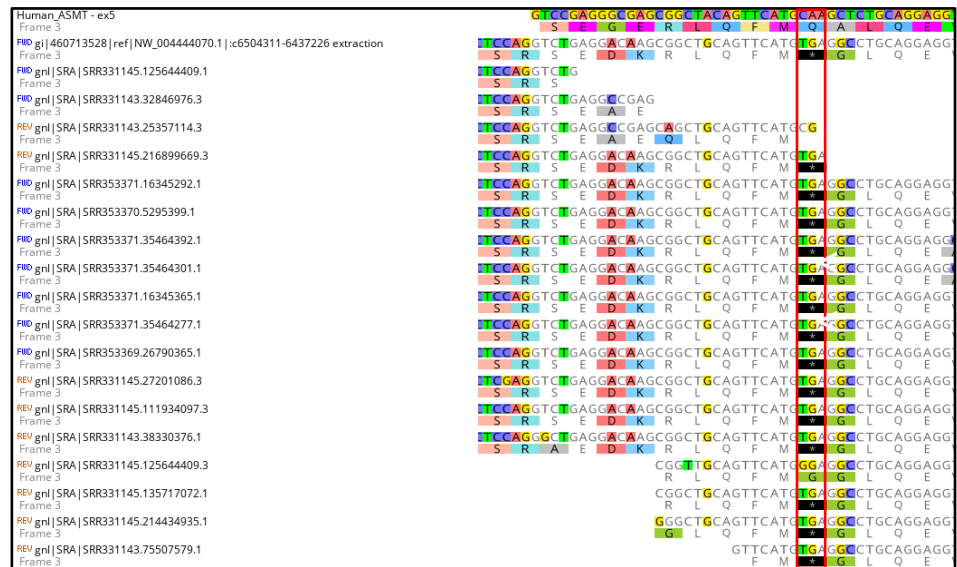

**Figure S27:** SRA validation for premature stop codon in exon 5 of the *Asmt* gene from *T. manatus latirostris*.

***Trichechus manatus latirostris***

SRA searched:

SRR307134 - Broad Institute (BI) 2011-07-08 **Sample ID:** SAMN00632092

SRR307135 - Broad Institute (BI) 2011-07-08 **Sample ID:** SAMN00632092

SRR307136 - Broad Institute (BI) 2011-07-08 **Sample ID:** SAMN00632092

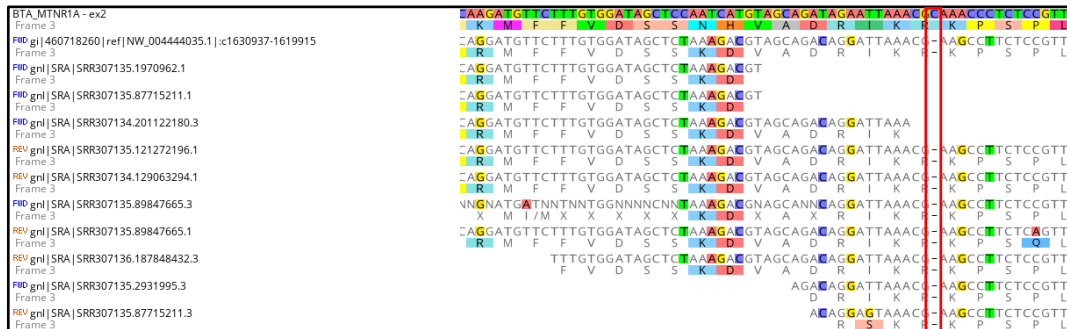

**Figure S28:** SRA validation for single nucleotide insertion in exon 2 of the *Mtnr1a* gene from *T. manatus latirostris*.

***Trichechus manatus latirostris***

SRA searched:

SRR307134 - Broad Institute (BI) 2011-07-08 **Sample ID:** SAMN00632092

SRR307135 - Broad Institute (BI) 2011-07-08 **Sample ID:** SAMN00632092

SRR307136 - Broad Institute (BI) 2011-07-08 **Sample ID:** SAMN00632092

SRR307137 - Broad Institute (BI) 2011-07-08 **Sample ID:** SAMN00632092

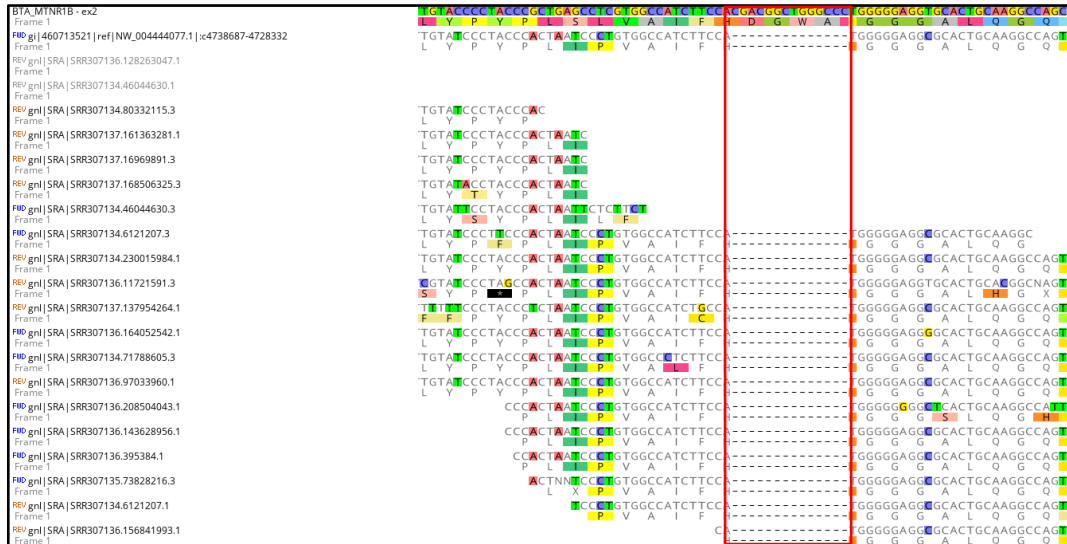

**Figure S29:** SRA validation for frameshift mutation in exon 2 of the *Mtnr1b* gene from *T. manatus latirostris*.



**Table S1:** Blast-n output of *Bos taurus* and *Homo sapiens* sequences against the *H. amphibius* genome. These values were used to find the loci of *Hippopotamus amphibius* that contains the genes *Aanat*, *Mtnr1a* and *Mtnr1b*.

| Species             | Accession numbers | Gene symbol | Scaffolds of <i>H. amphibius</i> genome | ID%    | Exon number | Length | Gaps | qstart | qend | sstart | send  | E-value  | Bitscore |
|---------------------|-------------------|-------------|-----------------------------------------|--------|-------------|--------|------|--------|------|--------|-------|----------|----------|
| <i>Bos taurus</i>   | NM_177509.2       | AANAT       | NKPW01005924.1                          | 87.117 | 1           | 163    | 0    | 1      | 163  | 56196  | 56034 | 1.71e-44 | 185      |
| <i>Bos taurus</i>   | NM_177509.2       | AANAT       | NKPW01005924.1                          | 91.720 | 2           | 157    | 0    | 163    | 319  | 55714  | 55558 | 1.68e-54 | 219      |
| <i>Bos taurus</i>   | NM_177509.2       | AANAT       | NKPW01005924.1                          | 86.452 | 3           | 310    | 2    | 316    | 624  | 55168  | 54860 | 1.24e-90 | 339      |
| <i>Bos taurus</i>   | XM_024981048.1    | AANAT       | NKPW01005924.1                          | 87.730 | 1           | 163    | 0    | 1      | 163  | 44541  | 44379 | 3.66e-46 | 191      |
| <i>Bos taurus</i>   | XM_024981048.1    | AANAT       | NKPW01005924.1                          | 90.604 | 2           | 149    | 0    | 163    | 311  | 44059  | 43911 | 2.19e-48 | 198      |
| <i>Bos taurus</i>   | XM_024981048.1    | AANAT       | NKPW01005924.1                          | 83.495 | 3           | 309    | 0    | 316    | 624  | 43518  | 43210 | 1.26e-75 | 289      |
| <i>Bos taurus</i>   | NM_001206907.2    | MTNR1B      | NKPW01013551.1                          | 94.667 | 1           | 225    | 0    | 1      | 225  | 40814  | 40590 | 1.06e-93 | 350      |
| <i>Bos taurus</i>   | NM_001206907.2    | MTNR1B      | NKPW01013551.1                          | 88.575 | 2           | 814    | 0    | 221    | 1034 | 26808  | 25995 | 0.0      | 989      |
| <i>Bos taurus</i>   | NM_005958.4       | MTNR1A      | NKPW01072562.1                          | 84.737 | 1           | 190    | 6    | 5      | 185  | 789    | 978   | 3.79e-43 | 182      |
| <i>Bos taurus</i>   | NM_005958.4       | MTNR1A      | NKPW01009466.1                          | 85.682 | 2           | 873    | 3    | 183    | 1053 | 13832  | 14702 | 0.0      | 917      |
| <i>Homo sapiens</i> | NM_004043.2       | ASMT        | NKPW01039339.1                          | 81.250 | 2           | 176    | 2    | 68     | 241  | 2180   | 2005  | 6.87E-29 | 141      |
| <i>Homo sapiens</i> | NM_004043.2       | ASMT        | NKPW01075055.1                          | 78.333 | 5           | 120    | 0    | 441    | 560  | 1215   | 1334  | 5.46E-10 | 78.7     |
| <i>Homo sapiens</i> | NM_004043.2       | ASMT        | NKPW01040565.1                          | 77.778 | 7           | 144    | 1    | 653    | 795  | 6591   | 6734  | 9.08E-13 | 87.9     |
| <i>Homo sapiens</i> | NM_004043.2       | ASMT        | NKPW01040565.1                          | 86.667 | 8           | 135    | 3    | 786    | 918  | 8397   | 8530  | 1.48E-30 | 147      |
| <i>Homo sapiens</i> | NM_004043.2       | ASMT        | NKPW01040565.1                          | 74.528 | 9           | 212    | 2    | 908    | 1118 | 2399   | 2609  | 7.02E-14 | 91.6     |

**Table S2:** Accession numbers of the *Aanat* orthologues sequences used in phylogenetic analyses.

| Species                               | Tree CODE              | Gene ID   | Accession Number Nucleotide | Gene Symbol  | Lineage                       |
|---------------------------------------|------------------------|-----------|-----------------------------|--------------|-------------------------------|
| <i>Pan troglodytes</i>                | <i>P. troglodytes</i>  | 503504    | NM_001012440.1              | Aanat        | Primate-Hominoidae            |
| <i>Homo sapiens</i>                   | <i>H. sapiens</i>      | 15        | NM_001166579.1              | Aanat        | Primate-Hominoidae            |
| <i>Pongo abelii</i>                   | <i>P. abelii</i>       | 100433977 | XM_002827870.4              | Aanat        | Primate-Hominoidae            |
| <i>Macaca mulatta</i>                 | <i>M. mulatta</i>      | 706924    | NM_001047127.1              | Aanat        | Primate-Cercopithecoidea      |
| <i>Papio anubis</i>                   | <i>P. anubis</i>       | 101021111 | XM_021928021.1              | Aanat        | Primate-Cercopithecoidea      |
| <i>Ptilocolobus tephrosceles</i>      | <i>P. tephrosceles</i> | 111542384 | XM_023211738.1              | Aanat        | Primate-Cercopithecoidea      |
| <i>Microcebus murinus</i>             | <i>M. murinus</i>      | 105878976 | XM_012778898.2              | Aanat        | Primate-Strepsirrhini         |
| <i>Bubalus bubalis</i>                | <i>B. bubalis</i>      | 102412521 | XM_006045309.1              | LOC102412521 | Artiodactyla                  |
| <i>Bos taurus</i>                     | <i>B. taurus</i>       | 281583    | NM_177509.2                 | Aanat        | Artiodactyla                  |
| <i>Bos taurus</i>                     | <i>B. taurus</i>       | 112442710 | XM_024981048.1              | Aanat        | Artiodactyla                  |
| <i>Capra hircus</i>                   | <i>C. hircus</i>       | 102190991 | XM_018064062.1              | Aanat        | Artiodactyla                  |
| <i>Capra hircus</i>                   | <i>C. hircus</i>       | 100860947 | NM_001285561.1              | Aanat        | Artiodactyla                  |
| <i>Ovis aries</i>                     | <i>O. aries</i>        | 443531    | NM_001009461.1              | Aanat        | Artiodactyla                  |
| <i>Odocoileus virginianus texanus</i> | <i>O. virginianus</i>  | 110152065 | XM_020915599.1              | LOC110152065 | Artiodactyla                  |
| <i>Hippopotamus amphibius</i>         | <i>H. amphibius</i>    | -         | -                           | -            | Artiodactyla                  |
| <i>Hippopotamus amphibius</i>         | <i>H. amphibius</i>    | -         | -                           | -            | Artiodactyla                  |
| <i>Sus scrofa</i>                     | <i>S. scrofa</i>       | 100518330 | XM_005656910.3              | LOC100518330 | Artiodactyla                  |
| <i>Vicugna pacos</i>                  | <i>V. pacos</i>        | 102540360 | XM_006199417.1              | Aanat        | Artiodactyla                  |
| <i>Camelus dromedarius</i>            | <i>C. dromedarius</i>  | 105092185 | XM_010983838.1              | Aanat        | Artiodactyla                  |
| <i>Camelus ferus</i>                  | <i>C. ferus</i>        | 102522698 | XM_006176501.1              | Aanat        | Artiodactyla                  |
| <i>Equus asinus</i>                   | <i>E. asinus</i>       | 106830333 | XM_014839904.1              | Aanat        | Perissodactyla-Equidea        |
| <i>Equus caballus</i>                 | <i>E. caballus</i>     | 100058770 | XM_023651967.1              | Aanat        | Perissodactyla-Equidea        |
| <i>Ceratotherium simum simum</i>      | <i>C. simum</i>        | 101404984 | XM_014789296.1              | LOC101404984 | Perissodactyla-Rhinocerotidae |

**Table S3:** Accession numbers of the *Mtnr1a* orthologues sequences used in phylogenetic analyses.

| Species                          | Tree CODE              | Gene ID   | Accession Number Nucleotide | Gene Symbol  | Lineage                       |
|----------------------------------|------------------------|-----------|-----------------------------|--------------|-------------------------------|
| <i>Homo sapiens</i>              | <i>H. sapiens</i>      | 4543      | NM_005958.4                 | MTNR1A       | Primate-Hominoidea            |
| <i>Nomascus leucogenys</i>       | <i>N. leucogenys</i>   | 100594737 | XM_003271501.1              | MTNR1A       | Primate-Hominoidea            |
| <i>Pan troglodytes</i>           | <i>P. troglodytes</i>  | 471417    | XM_016952653.1              | MTNR1A       | Primate-Hominoidea            |
| <i>Macaca mulatta</i>            | <i>M. mulatta</i>      | 702686    | XM_001090972.3              | MTNR1A       | Primate-Cercopithecoidea      |
| <i>Papio anubis</i>              | <i>P. anubis</i>       | 101005602 | XM_003899434.4              | MTNR1A       | Primate-Cercopithecoidea      |
| <i>Ptilocolobus tephrosceles</i> | <i>P. tephrosceles</i> | 111548519 | XM_023221040.2              | MTNR1A       | Primate-Cercopithecoidea      |
| <i>Microcebus murinus</i>        | <i>M. murinus</i>      | 105882472 | XM_012784869.1              | MTNR1A       | Primate-Strepsirrhini         |
| <i>Bison bison bison</i>         | <i>B. bison</i>        | 104985582 | XM_010835821.1              | MTNR1A       | Artiodactyla                  |
| <i>Bubalus bubalis</i>           | <i>B. bubalis</i>      | 102415439 | XM_006076173.1              | MTNR1A       | Artiodactyla                  |
| <i>Bos taurus</i>                | <i>B. taurus</i>       | 539948    | XM_002698656.4              | MTNR1A       | Artiodactyla                  |
| <i>Capra hircus</i>              | <i>C. hircus</i>       | 102189094 | XM_018041838.1              | MTNR1A       | Artiodactyla                  |
| <i>Ovis aries</i>                | <i>O. aries</i>        | 443022    | NM_001009725.1              | MTNR1A       | Artiodactyla                  |
| <i>Hippopotamus amphibius</i>    | <i>H. amphibius</i>    | -         | -                           | MTNR1A       | Artiodactyla                  |
| <i>Equus caballus</i>            | <i>E. caballus</i>     | 100056423 | XM_001490171.3              | MTNR1A       | Perissodactyla-Equidea        |
| <i>Equus przewalskii</i>         | <i>E. przewalskii</i>  | 103549958 | XM_008518624.1              | MTNR1A       | Perissodactyla-Equidea        |
| <i>Equus asinus</i>              | <i>E. asinus</i>       | 106840379 | XM_014855805.1              | MTNR1A       | Perissodactyla-Equidea        |
| <i>Ceratotherium simum simum</i> | <i>C. simum</i>        | 101391490 | XM_004428772.1              | LOC101391490 | Perissodactyla-Rhinocerotidae |

**Table S4:** Accession numbers of the *Mtnr1b* orthologues sequences used in phylogenetic analyses.

| Species                               | Tree CODE              | Gene ID   | Accession Number Nucleotide | Gene Symbol  | Lineage                       |
|---------------------------------------|------------------------|-----------|-----------------------------|--------------|-------------------------------|
| <i>Pan troglodytes</i>                | <i>P. troglodytes</i>  | 466747    | XM_016921786.2              | Mtnr1b       | Primate-Hominoidae            |
| <i>Homo sapiens</i>                   | <i>H. sapiens</i>      | 4544      | NM_005959.3                 | Mtnr1b       | Primate-Hominoidae            |
| <i>Pan paniscus</i>                   | <i>P. paniscus</i>     | 100973621 | XM_003813777.1              | Mtnr1b       | Primate-Hominoidae            |
| <i>Papio anubis</i>                   | <i>P. anubis</i>       | 100999162 | XM_003910543.3              | Mtnr1b       | Primate-Cercopithecoidea      |
| <i>Ptilocolobus tephrosceles</i>      | <i>P. tephrosceles</i> | 111540700 | XM_023209139.2              | Mtnr1b       | Primate-Cercopithecoidea      |
| <i>Microcebus murinus</i>             | <i>M. murinus</i>      | 105857333 | XM_012739636.1              | Mtnr1b       | Primate-Strepsirrhini         |
| <i>Ovis aries</i>                     | <i>O. aries</i>        | 100174786 | NM_001130938.1              | Mtnr1b       | Artiodactyla                  |
| <i>Capra hircus</i>                   | <i>C. hircus</i>       | 102176302 | XM_018042917.1              | Mtnr1b       | Artiodactyla                  |
| <i>Bubalus bubalis</i>                | <i>B. bubalis</i>      | 102409257 | XM_006053939.1              | Mtnr1b       | Artiodactyla                  |
| <i>Bos taurus</i>                     | <i>B. taurus</i>       | 528665    | NM_001206907.2              | Mtnr1b       | Artiodactyla                  |
| <i>Hippopotamus amphibius</i>         | <i>H. amphibius</i>    | -         | -                           | Mtnr1b       | Artiodactyla                  |
| <i>Camelus bactrianus</i>             | <i>C. bactrianus</i>   | 105083508 | XM_010973367.1              | Mtnr1b       | Artiodactyla                  |
| <i>Camelus dromedarius</i>            | <i>C. dromedarius</i>  | 105094616 | XM_010986681.1              | Mtnr1b       | Artiodactyla                  |
| <i>Odocoileus virginianus texanus</i> | <i>O. virginianus</i>  | 110127734 | XM_020878096.1              | Mtnr1b       | Artiodactyla                  |
| <i>Equus caballus</i>                 | <i>E. caballus</i>     | 100059172 | XM_001917051.2              | Mtnr1b       | Perissodactyla-Equidea        |
| <i>Equus przewalskii</i>              | <i>E. przewalskii</i>  | 103548037 | XM_008515596.1              | Mtnr1b       | Perissodactyla-Equidea        |
| <i>Equus asinus</i>                   | <i>E. asinus</i>       | 106827482 | XM_014835349.1              | Mtnr1b       | Perissodactyla-Equidea        |
| <i>Ceratotherium simum simum</i>      | <i>C. simum</i>        | 101399557 | XM_004427448.1              | LOC101399557 | Perissodactyla-Rhinocerotidae |

**Gene annotations:** In silico gene annotations of *Aanat*, *Mtnr1a* and *Mtnr1b* in *H. amphibius*

*Aanat* genes of *Hippopotamus amphibius* annotated by Augustus Software.

----- prediction on sequence number 1 (length = 65446, name = NKPW01005924.1) -----

Gene 1

```
NKPW01005924.1  AUGUSTUS  gene    43218  44549  0.28  -    .    g2
NKPW01005924.1  AUGUSTUS  transcript  43218  44549  0.28  -    .    g2.t1
NKPW01005924.1  AUGUSTUS  stop_codon  43218  43220  .    -    0
transcript_id "g2.t1"; gene_id "g2";
NKPW01005924.1  AUGUSTUS  terminal    43218  43503  0.38  -    1
transcript_id "g2.t1"; gene_id "g2";
NKPW01005924.1  AUGUSTUS  internal    43916  44066  0.37  -    2
transcript_id "g2.t1"; gene_id "g2";
NKPW01005924.1  AUGUSTUS  initial    44387  44549  0.8   -    0    transcript_id
"g2.t1"; gene_id "g2";
NKPW01005924.1  AUGUSTUS  CDS        43218  43503  0.38  -    1    transcript_id
"g2.t1"; gene_id "g2";
NKPW01005924.1  AUGUSTUS  CDS        43916  44066  0.37  -    2    transcript_id
"g2.t1"; gene_id "g2";
NKPW01005924.1  AUGUSTUS  CDS        44387  44549  0.8   -    0    transcript_id
"g2.t1"; gene_id "g2";
NKPW01005924.1  AUGUSTUS  start_codon  44547  44549  .    -    0
transcript_id "g2.t1"; gene_id "g2";
```

coding sequence =

```
[atgtccacacagaccatccaatacatgaagcctgtggctctgcacctgccacctgggatccagagtcgccaagccgccagcggcgccataca
ctccccgcaatgagttccgctgcctcaccagaggacgctgctgacgtgttgagattgagcgagaggccttcctctgtctcgggcgctgc
cccctgcaactggaccaggtccagcacttctgaccgtgtgccgagctgtccctgggctgctcgtggagggccgctcgtggccttcatt
ggctccctgtgggacaaggagagactcaggccccggggccacacagcccacctgcaattgctggccgtgcgccgccccctccggcgtctggg
caacgggtccaccctgctctggcgctctctgcaccacctggatggcaagccggccgtgcgccggacctcgtcatgtgcgaggaccattgggtgc
ccttctaccagaggttcggctccacctgtgggcccgtgtgccgtgacctgggctcctcaccttcacggagatggagcgtccccgtggggc
catgcctcctgcgcaggaacagtacagctga]
```

protein sequence =

```
[MSTQTIQYMKPVALHLPPGIPESPSRQRRHTLPANEFRCLTPEDAADVFEIEREAFISVSGACP
LQLDQVQHFLTVCPPELVLGCFVEGRLVAFIIGSLWDKERLRPGGHTAHLHLLAVRRPFRRLG
NGSTLLWRSLHHLDGKPAVRRRSLMCEDPLVPFYQRFQFHPVGPACAVTVGSLTFTEMERSP
WGHASLRRNSDS]
```

Gene 2

```
NKPW01005924.1  AUGUSTUS  gene    54868  56204  0.87  -    .    g3
```

|                |          |                                      |       |       |      |   |   |               |
|----------------|----------|--------------------------------------|-------|-------|------|---|---|---------------|
| NKPW01005924.1 | AUGUSTUS | transcript                           | 54868 | 56204 | 0.87 | - | . | g3.t1         |
| NKPW01005924.1 | AUGUSTUS | stop_codon                           | 54868 | 54870 | .    | - | 0 |               |
|                |          | transcript_id "g3.t1"; gene_id "g3"; |       |       |      |   |   |               |
| NKPW01005924.1 | AUGUSTUS | terminal                             | 54868 | 55173 | 0.93 | - | 0 |               |
|                |          | transcript_id "g3.t1"; gene_id "g3"; |       |       |      |   |   |               |
| NKPW01005924.1 | AUGUSTUS | internal                             | 55567 | 55721 | 0.97 | - | 2 |               |
|                |          | transcript_id "g3.t1"; gene_id "g3"; |       |       |      |   |   |               |
| NKPW01005924.1 | AUGUSTUS | initial                              | 56042 | 56204 | 0.95 | - | 0 | transcript_id |
|                |          | "g3.t1"; gene_id "g3";               |       |       |      |   |   |               |
| NKPW01005924.1 | AUGUSTUS | CDS                                  | 54868 | 55173 | 0.93 | - | 0 | transcript_id |
|                |          | "g3.t1"; gene_id "g3";               |       |       |      |   |   |               |
| NKPW01005924.1 | AUGUSTUS | CDS                                  | 55567 | 55721 | 0.97 | - | 2 | transcript_id |
|                |          | "g3.t1"; gene_id "g3";               |       |       |      |   |   |               |
| NKPW01005924.1 | AUGUSTUS | CDS                                  | 56042 | 56204 | 0.95 | - | 0 | transcript_id |
|                |          | "g3.t1"; gene_id "g3";               |       |       |      |   |   |               |
| NKPW01005924.1 | AUGUSTUS | start_codon                          | 56202 | 56204 | .    | - | 0 |               |
|                |          | transcript_id "g3.t1"; gene_id "g3"; |       |       |      |   |   |               |

coding sequence =

```
[atgtccacacagaccatccaatacatgaagcctgtggctctgcacctgccacctgggatcccagagtcgccaagccgccagcgggccataca
ctccccgcaatgagttccgctgcctcaccagaggacgctgctgacgtgtttgagattgagcagagggccttcattctctgtctcgggcgtctgcc
ccctgcaactggaccaggtccagcacttctgacctgtgtgccgagctgccttgggctgcttctgtggagggccgcctcgtggccttcattg
gctccctgtgggacaaggagagactcactcaggagtcactgacactacacaggccccggggccacacagcccactgcacttctgtggcgtgc
accgcacctccggcagctggggaagggtccaccctgctctggcggttacctgcaccatctggatggccagccggccgtgcgccgggcccgtgc
tcatgtgcgaggaccattgggtgcccttctaccagaggttcggctccaccctgttggcctgtgtgccgcgaccgtgggctccctcaccttcacgga
gatgcaatgctcctgagggggccacgcctccctgcgcagaacagtgacagctga]
```

protein sequence =

```
[MSTQTIQYMKPVALHLPPGIPESPSRQRRHTLPANEFRCLTPEDAADVFEIEREAFISVSGVCP
LQLDQVQHFLTVCPELSLGC FVEGRLVAFIIGSLWDKERLTQESLTLHRPGGHTAHLHLLAV
HRTFRQLGKGSTLLWRYLHHLDGQPAVRRAVLMCEDPLVPFYQRFGFHPVGLCAATVGS
LTFTEMQCSLRGHASLRNDS]
```

*Mtnr1a* gene of Hippopotamus amphibius annotated by Augustus Software.

----- prediction on sequence number 1 (length = 65443, name = NKPW01072562.1 and NKPW01009466.1) -----

#

Constraints/Hints:

(none)

Predicted genes for sequence number 1 on both strands

start gene g1

|                               |                        |               |       |       |      |   |   |
|-------------------------------|------------------------|---------------|-------|-------|------|---|---|
| NKPW01072562.1_NKPW01009466.1 | AUGUSTUS               | gene          | 770   | 16959 | 0.32 | + | . |
| g1                            |                        |               |       |       |      |   |   |
| NKPW01072562.1_NKPW01009466.1 | AUGUSTUS               | transcript    | 770   | 16959 | 0.32 | + | . |
| g1.t1                         |                        |               |       |       |      |   |   |
| NKPW01072562.1_NKPW01009466.1 | AUGUSTUS               | start_codon   | 770   | 772   | .    | + | . |
| 0                             | transcript_id "g1.t1"; | gene_id "g1"; |       |       |      |   |   |
| NKPW01072562.1_NKPW01009466.1 | AUGUSTUS               | initial       | 770   | 998   | 1    | + | 0 |
| transcript_id "g1.t1";        | gene_id "g1";          |               |       |       |      |   |   |
| NKPW01072562.1_NKPW01009466.1 | AUGUSTUS               | terminal      | 16091 | 16959 | 0.32 | + | 2 |
| 2                             | transcript_id "g1.t1"; | gene_id "g1"; |       |       |      |   |   |
| NKPW01072562.1_NKPW01009466.1 | AUGUSTUS               | CDS           | 770   | 998   | 1    | + | 0 |
| transcript_id "g1.t1";        | gene_id "g1";          |               |       |       |      |   |   |
| NKPW01072562.1_NKPW01009466.1 | AUGUSTUS               | CDS           | 16091 | 16959 | 0.32 | + | 2 |
| transcript_id "g1.t1";        | gene_id "g1";          |               |       |       |      |   |   |
| NKPW01072562.1_NKPW01009466.1 | AUGUSTUS               | stop_codon    | 16957 | 16959 | .    | + | . |
| 0                             | transcript_id "g1.t1"; | gene_id "g1"; |       |       |      |   |   |

coding sequence =

```
[atggctggggggccgtggggcgcgccgggaggggcccctcaagggaacggcagcgcgctgctcaatgcctcgcagcagggcgcctggcagcggggagggcgcgccctccttgctggtcaccacgctcgcctcctcctcaccatcgtggtggacatcctgggcaacctcctggcctcctgtccgtgtatcggaaagaagctgaggaacgcaggaaatattgtggtgagcctagcagttgcagacctgctggtggccgtgta tccatacccttgccctgacatctatctcaacaatgggtggagcctgggctacctgactgccagattagtggtcctctgatgggcttgagtgtcat tggctccgtattcaatatcacggggattgccatcaaccgctattgctacatctgccacagctccagtagcagaggtgtacagcaacaagaattccc tctgctatgtgtcctgatattggatgttgacactgtggcaatcgtgcccaactgtgtattggaacctgcggtacgacctgaggatctattcctgtac attcacacagtcacatcagttccgctacacgatagccgtggtggtttccattcatggttccataggtcatagtaattctctgttacctaagaatctgggt cctggttctcaggtcagatggagggtgaaacctgacaacaacccaaactgaaaccacaggacttcaggaattttgcaccatgtttggtttttgt actttttgccatttctgggcccctctaaacttcattggtcttctgtggcctcagaccccgccagatggtatccaggatccagagtggtggtttgtg gccagttactatatggcgtatttcaacagctgcctcaacgcaattatatggactactgaaccaaatttcaggcaggaatacaggagaattatagtc tcaactgtgcacagccaagatgttcttggatagcttaacaatgtcgcagatagaatcaaatgcaaaccctctccattaataaccaaccataaccta ataaaggtggactccgttaa]
```

protein sequence =

```
[MAGGPWGAPGGASKGNGSALLNASQQAPGSGEGAPSRPSWLVTTLALILIFTIVVDILGNLL VILSVYRNKKLRNAGNIFVVS LAVADLLVAVYPYPLALTSIFNNGWSLGYLHCQISGFLMGL SVIGSVFNITGIAINRYCYICHSLQYDRLYSNKNSLCYVFLIWMLTLVAIVPNLCIGTLRYDPRI YSCTFTQSISSAYTIAVVVFHFMVPMVIVIFCYLRIWVVLVQVRWRVKPDNPKLKPQDFRN FVTMFVVFVFLFAICWAPLNFGLAVASDPASMVSRIPEWLFVASYMAYFNLSCLNAIYGLL NQNFRQEYRRIIVSLCTAKMFFVDSSNNVADRIKCKPSPLITNHNLIKVDSV]
```

*Mtnr1b* gene of Hippopotamus amphibius annotated by Augustus Software.

----- prediction on sequence number 1 (length = 40943, name = NKPW01013551.1) -----

#

Constraints/Hints:

(none)

Predicted genes for sequence number 1 on both strands

start gene g1

|                |          |                  |                        |       |   |   |   |               |  |
|----------------|----------|------------------|------------------------|-------|---|---|---|---------------|--|
| NKPW01013551.1 | AUGUSTUS | gene             | 25975                  | 40822 | 1 | - | . | g1            |  |
| NKPW01013551.1 | AUGUSTUS | transcript       | 25975                  | 40822 | 1 | - | . | g1.t1         |  |
| NKPW01013551.1 | AUGUSTUS | stop_codon       | 25975                  | 25977 | . | - | 0 |               |  |
|                |          | transcript_id    | "g1.t1"; gene_id "g1"; |       |   |   |   |               |  |
| NKPW01013551.1 | AUGUSTUS | terminal         | 25975                  | 26813 | 1 | - | 2 |               |  |
|                |          | transcript_id    | "g1.t1"; gene_id "g1"; |       |   |   |   |               |  |
| NKPW01013551.1 | AUGUSTUS | initial          | 40600                  | 40822 | 1 | - | 0 | transcript_id |  |
|                |          | "g1.t1"; gene_id | "g1";                  |       |   |   |   |               |  |
| NKPW01013551.1 | AUGUSTUS | CDS              | 25975                  | 26813 | 1 | - | 2 | transcript_id |  |
|                |          | "g1.t1"; gene_id | "g1";                  |       |   |   |   |               |  |
| NKPW01013551.1 | AUGUSTUS | CDS              | 40600                  | 40822 | 1 | - | 0 | transcript_id |  |
|                |          | "g1.t1"; gene_id | "g1";                  |       |   |   |   |               |  |
| NKPW01013551.1 | AUGUSTUS | start_codon      | 40820                  | 40822 | . | - | 0 |               |  |
|                |          | transcript_id    | "g1.t1"; gene_id "g1"; |       |   |   |   |               |  |

coding sequence =

```
[atgcccgagaaccgctcctcgccaactgctgcgaggcgggcccggagccgagagcccaggctggactggggcgggcggcgcgcggcc
ctccgggacccccggcctccctgggtggcgcccgcgctgtccgccgtgctcatcgcaccaccgcggtggacatcgtgggcaacctcctggtc
atcctctcgggtgctcgggaaccgcaagctccggaacgcaggaattgtcttggtagtctggcattggctgacctggcggtgacctgtaccct
accgctaatacctcgtcgcacatctccacaacggctgggcccctgggggagggcgcactgcaaggccagcgccttcgtgatgggtctgagcgtcat
cggtctgtcttcaacatcaccgcatcgccattaaccgctactgctacgtctgccgcagcgtgacctaccaccgcatctaccgcaactggcacac
cgccctgtacatctgccttgtctggctgctcaccctgtggcctgtgtaaccaacttcttggggtccttgagatgacctcgcactactcttgc
acctcatccagacggccagcggcggttacggctggcctggtggtggtccactcctcctcccatggctatcgtgtgctcctgtacctgcgca
tctgggtgctggtgctccgggcccgcaggaaggtcaaggcggagagcaagccgtgctgtggtccaggaacgtccggagcttctgacctgtt
cgtggtgtttgtgatcttcgcatctgctgggcgccctgaactgcattggcctcgtgtggccatcgaccagaagaagtggctccccgggtccc
agaggggctcttgtcacgactacttctggctatttcaacagctgcttaatgcatcatctacgggcttgaaccagaactccgcaggaata
caagaagatcgtctctgccccttggaaaccacggcgtgcccagcaggactctccaagggcagccagggaggggccagagacccaagctc
ccgcccgtggttaa]
```

protein sequence =

```
[MPENRSFANCCEAGGRAESPGWTGAGGARPSGTTPRPPWVAPALSAVLIVTTAVDIVGNLLV
ILSVLGNRKLNRNAGNLFLVSLALADLAVALYPYPLILVAIFHNGWALGEAHCKASAFVMGL
SVIGSVFNITAIANRYCYVCRSVTYHRIYRHWHTALYICLVWLLTLLAVVPNFFLGSLEYDP
RIYSCTFIQTASAGYTVAVVVVHFLPMAIVCSCYLRIWVLRARRKVKAESKPCLWSRNV
```



RSFLTMFVVFVIFAICWAPLNCIGLAV AIDPEEVAPRVPEGLFVTSYFLAYFNSCLNAIIYGLL  
NQNFRREYKKIVSALWNPRRCQQDSSKGSQAEGPETQAPRRG]
